1 **TITLE**

2 Systems immunology reveals the molecular mechanisms of heterogeneous influenza  
3 vaccine response in the elderly

4

5 **AUTHORS**

6 Saumya Kumar<sup>1,2#</sup>, Martijn Zoodma<sup>1,2#</sup>, Nhan Nguyen<sup>1,2</sup>, Rodrigo Pedroso<sup>3</sup>, Stephanie  
7 Trittel<sup>4</sup>, Peggy Riese<sup>4</sup>, Javier Botey-Bataller<sup>1,2,5</sup>, Liang Zhou<sup>1,2</sup>, Ahmed Alaswad<sup>1,2</sup>, Haroon  
8 Arshad<sup>2,9</sup>, Mihai G. Netea<sup>5,6</sup>, Cheng-Jian Xu<sup>1,2,5</sup>, Frank Pessler<sup>1,7</sup>, Carlos A. Guzmán<sup>1,4</sup>, Luis  
9 Graca<sup>3</sup>, Yang Li<sup>1,2,5,8,10,\*</sup>

10

11 **AFFILIATIONS**

- 12 1. Centre for Individualised Infection Medicine (CiiM), a joint venture between the  
13 Helmholtz Centre for Infection Research (HZI) and Hannover Medical School (MHH),  
14 Feodor-Lynen-Straße 7, 30625 Hannover, Germany.
- 15 2. TWINCORE, a joint venture between the Helmholtz-Centre for Infection Research  
16 (HZI) and the Hannover Medical School (MHH), Feodor-Lynen-Straße 7, 30625  
17 Hannover, Germany.
- 18 3. Instituto de Medicina Molecular João Lobo Antunes, Faculdade de Medicina,  
19 Universidade de Lisboa, Lisboa, Portugal.
- 20 4. Department Vaccinology and Applied Microbiology, HZI, Inhoffenstraße 7, 38124  
21 Braunschweig, Germany
- 22 5. Department of Internal Medicine and Radboud Center for Infectious Diseases,  
23 Radboud University Medical Center, Geert Grooteplein Zuid 8, 6525 GA Nijmegen,  
24 the Netherlands.
- 25 6. Department of Immunology and Metabolism, Life and Medical Sciences Institute  
26 (LIMES), University of Bonn, Bonn, Germany.
- 27 7. Research Group Biomarkers for Infectious Diseases, TWINCORE, Feodor-Lynen-  
28 Straße 7, 30625 Hannover, Germany.
- 29 8. Cluster of Excellence Resolving Infection Susceptibility (RESIST; EXC 2155),  
30 Hannover Medical School, Hannover, Germany.
- 31 9. Present address: Department of Pharmaceutical Sciences, University of Faisalabad,  
32 Faisalabad 38000, Pakistan.

33

34 **AUTHOR LIST FOOTNOTES**

35 # These authors contributed equally

36 <sup>10</sup> Lead contact

37 \* Correspondence: [yang.li@helmholtz-hzi.de](mailto:yang.li@helmholtz-hzi.de) (Y.L.)

38

39 **HIGHLIGHTS**

- 40 1. Pre-vaccination pro-inflammatory status impedes vaccine responsiveness in the  
41 elderly.
- 42 2. Multi-omics integration reveals key molecules involved in vaccine response.
- 43 3. High pre-vaccination concentrations of IL-15 suppresses vaccine response through  
44 NK cell activation.
- 45 4. Certain long-chain fatty acids may act as modulators against chronic inflammation  
46 and are potential targets to improve vaccine response.

47

48

49 **SUMMARY**

50

51 Vaccination-induced protection against influenza is greatly diminished and increasingly  
52 heterogeneous with age. We investigated longitudinally (up to five timepoints) a cohort of  
53 234 elderly influenza vaccinees across two independent seasons including up to six  
54 modalities (multi-omics and immunological parameters). System-level analyses revealed  
55 responders exhibited time-dependent changes attributed to a productive vaccine response  
56 across all omics layers whereas non-responders did not follow such dynamics, suggestive of  
57 systemic dysregulation. Through multi-omics integration, we identified key metabolites and  
58 proteins and their likely role in immune response to vaccination. High pre-vaccination IL-15  
59 concentrations negatively associated with antibody production, further supported by  
60 experimental validation in mice revealing an IL-15-driven NK-cell axis with a suppressing  
61 role on antibody production. Finally, we propose certain long-chain fatty acids as modulators  
62 of persistent inflammation in non-responders. Our findings highlight the potential for  
63 stratification of vaccinees and open avenues for possible pharmacological interventions to  
64 enhance vaccine responses.

65

66 **Key words:** Systems immunology, influenza vaccination, elderly, IL-15, NK cells, long-chain  
67 fatty acids, multi-omics integration

68

69

70

71

72

73

74

75

76

77

78

79

80

81

82

83

84

85

86

87

88

89

90

91

92

93

94

95

96

97

## 98 INTRODUCTION

99

100 Influenza epidemics are major public health threats, with more than 400,000 fatalities  
101 estimated worldwide per year, mostly among the elderly<sup>1</sup>. Inactivated subunit influenza  
102 vaccination has proven to be the best preventive and cost-effective approach for inducing  
103 protective immune memory<sup>2,3</sup>. However, many factors, particularly old age, have been  
104 strongly associated with a reduced protection despite vaccination<sup>4,5</sup>. Consequently, the  
105 elderly population is more vulnerable to influenza infection and influenza-associated  
106 mortality<sup>1</sup>.

107

108 The inefficiency in generating protective immunity in the elderly has been attributed to the  
109 ageing of the immune system, which is often characterised by lingering low-grade  
110 inflammation and immunosenescence<sup>6</sup>. Our recent studies also showed that non-responders  
111 are specifically characterized by multiple suppressive immune mechanisms affecting  
112 regulatory T and B cells<sup>7</sup>. Earlier studies have also shown higher proportions of inflammatory  
113 monocytes and cytotoxic NK cells in the elderly compared to the younger population, along  
114 with lower B cell responses<sup>8</sup> that were attributed to intrinsic defects in T and B cells.  
115 Additionally, the elderly accumulate pro-inflammatory B cells that are unable to respond to  
116 influenza vaccination<sup>9,10</sup>. At the molecular level, lower AP-1 activity along with enhanced  
117 antiviral and interferon signalling in myeloid cells has been associated with a productive  
118 vaccination response<sup>11</sup>. Higher AP-1 activity induces activation of pro-inflammatory  
119 cytokines, which may contribute towards a higher inflammatory status<sup>11,12</sup>. However, in the  
120 younger population (< 50 years), pre-vaccination pro-inflammatory status driven through NF-  
121 kB signalling has been associated with high antibody response<sup>13</sup>. In addition to cytokines,  
122 metabolites may also serve as important regulators of immune responses<sup>14,15</sup>. Differences in  
123 metabolite profiles between young and elderly individuals have been reported, along with  
124 differential metabolic regulation of the immune response to vaccination<sup>16</sup>. Post-vaccination,  
125 young high responders showed reduced concentrations of polyunsaturated fatty acids  
126 (PUFAs), whereas cholesteryl esters accumulated more in elderly high responders<sup>16</sup>. Purine  
127 metabolism and glycine, serine and threonine metabolism have also been associated with  
128 the vaccine response<sup>16</sup>. Together, these studies have indicated complex and age-dependent  
129 metabolic regulation of the antibody response to vaccination.

130

131 Here, we used a systems immunology approach to examine the differential responsiveness  
132 to influenza vaccination within a previously well-established elderly cohort spanning two  
133 independent influenza seasons<sup>7,17-19</sup>. The transcriptional signatures of the highest and  
134 lowest responders allowed us to identify a chronic inflammatory signature that is distinct from  
135 the inflammatory signature supporting the vaccine response. We also show distinct changes  
136 in the plasma proteome and metabolome abundance upon vaccination in high and low  
137 responders. Furthermore, we identified pre-vaccination protein biomarkers associated with  
138 poor vaccine response. Additionally, we identified pre-vaccination metabolites associated  
139 with vaccine response, which may serve as potential modulators of the chronic inflammation  
140 in the elderly. Taken together, these findings illustrate that an increased pro-inflammatory  
141 profile is detrimental to influenza vaccine response in the elderly population. Results from  
142 this study provide insight into the immunological processes driving differential  
143 responsiveness to vaccination, and will open novel opportunities for improved vaccine

144 design as well as modulation of the immune system to enhance the vaccine response in the  
145 elderly.

146

147

## 148 **RESULTS**

149

### 150 ***Demographic characteristics and their association to vaccine response in the elderly***

151

152 We collected whole blood and plasma samples from 234 trivalent inactivated influenza  
153 vaccine (TIV)-vaccinees aged 65 and above in Hannover, Germany across two influenza  
154 seasons and generated a multimodal dataset covering whole blood transcriptome, plasma  
155 proteome, plasma/serum metabolome, and serology from up to five time points (pre-  
156 vaccination, days one-three, six-seven, 21-35 and 60-70 post-vaccination). By doing this,  
157 different stages of the vaccination response were covered (Figure 1A). Examining the  
158 serological data, we observe heterogeneity across the elderly donors, with the majority of  
159 donors showing sufficient antibody responses expected to confer protection. Donors were  
160 evaluated based on their antibody fold change (day 35 vs pre-vaccination) against the three  
161 strains included in the TIV vaccine<sup>7</sup>, and categorised as Triple Responders (TR, >4-fold rise  
162 in antibody titres against all three strains), Non Responders (NR, <4-fold rise in titres against  
163 all three strains), or Other (>4-fold rise in titres against one or two of the vaccine strains;  
164 Figure 1B). As we have access to data from two independent seasons, we used the larger  
165 cohort (season 2015/2016, n=200) as a discovery cohort, and the smaller cohort to replicate  
166 our findings (season 2014/2015, n=34).

167

168 We observed another layer of heterogeneity among donors based on pre-vaccination  
169 antibody titres. Previous studies have discussed the impact of high pre-vaccination  
170 hemagglutination inhibition (HAI) titres that lead to reduced antibody fold change upon  
171 vaccination<sup>8,20-22</sup>. Within our cohort, approximately one-third of the donors (H1N1:36%,  
172 B:34%, H3N2:33%) followed this pattern. Nevertheless, the majority of responders in this  
173 cohort (TRs and Others) still showed a high antibody response to vaccination that was  
174 independent of pre-vaccination titres, suggesting that pre-vaccination titres are not the only  
175 variable defining the vaccine response (Figure 1B). Consistent positive correlations among  
176 antibody titres against the three influenza strains and positive correlations between HAI titres  
177 and microneutralization (MN) titres per strain were observed (Supplementary Figure 1A-1B).  
178 We did not observe statistically significant differences in serological responses between  
179 elderly males and females (Supplemental Figure 1C). Across two seasons, we observed a  
180 significant negative correlation of antibody titres with age for the H1N1 strain, but not for the  
181 H3N2 and B strains (Supplementary Figure 1D). These observed patterns were replicated in  
182 the smaller cohort.

183

184

### 185 ***Distinct transcriptional signatures between elderly triple and non-responders***

186

187 We first evaluated transcriptome data generated from the 10 highest (TRs) and 10 lowest  
188 (NRs) responders to identify transcriptional differences between the groups and the  
189 transcriptomic dynamics of vaccine response resulting in 1466 significantly differentially  
190 expressed genes (DEGs) (adj. p-value < 0.01, Figure 1C). Functional significance of the  
191 differential transcriptome profiles between TRs and NRs (independent of time) was identified

192 using gene set enrichment analysis (GSEA) with blood transcriptome modules (BTMs)<sup>23</sup> as  
193 background (Supplementary Data 1). We found that the top 40 most significantly enriched  
194 modules showed a consistent upregulation of T and B cell related, and T cell activation  
195 modules in TRs, whereas NRs showed upregulation of inflammatory and inflammatory  
196 signalling modules (Figure 1D). These pathways were consistently upregulated in TRs and  
197 NRs at all time points, including pre-vaccination. These differences were also reflected by  
198 different proportions of immune cell populations in these donors using transcriptome  
199 deconvolution (CIBERSORT<sup>24</sup>, Figure 1E and Supplementary Figure 2A). In line with our  
200 enrichment results, we found that TRs had higher proportions of T and B cells, whereas NRs  
201 showed elevated proportions of neutrophils. These results agree with reported flow  
202 cytometry results<sup>7</sup> and with the observed trend of higher neutrophils in NRs at the pre-  
203 vaccination time point (Supplementary Figure 2B). Despite enrichment of monocyte-related  
204 BTMs in NRs, we did not observe differences in monocyte proportions between TRs and  
205 NRs in deconvolution or cell blood counts. This suggests higher activity of monocytes in NRs  
206 irrespective of cell proportions (Figure 1E and Supplementary Figure 2B).

207  
208 We next evaluated the pre-vaccination BTMs alone that separate TRs from NRs. We found  
209 TRs showed enrichment for T cell activation and signalling, Th2 differentiation and plasma/B  
210 cell modules (Figure 2A, Supplementary Data 2). A recent study described a high  
211 inflammatory pre-vaccination endotype that is predictive of high vaccine responders in  
212 adults, but not in the elderly<sup>13</sup>. In line with these results, we did not observe enrichment of  
213 inflammatory BTMs at the pre-vaccination time point in TRs. Instead, we observed an  
214 opposite pattern, in which TRs had lower enrichment of inflammatory modules compared to  
215 NRs (Supplementary Figure 3A). When we evaluated the expression patterns of the genes  
216 enriched in these pathways, we found only CD83 and IL23A to be significantly upregulated  
217 in TRs at all time points, suggesting that only select genes are important in elderly TRs and  
218 support the immune response (Supplementary Figure 3B). While we observed a gene  
219 expression pattern associated with cells engaged in humoral responses in TRs (which is in  
220 line with their high responsiveness to vaccination), the NRs presented a consistently  
221 upregulated inflammatory signature.

222

223

### 224 ***Major differences in post-vaccine transcriptional dynamics between elderly triple and*** 225 ***non-responders***

226

227 We then assessed transcriptional changes resulting from vaccination over time, in each  
228 group separately. Based on significant DEGs at each time point compared to pre-  
229 vaccination, we observed distinct post-vaccination dynamics between TRs and NRs. TRs  
230 showed an early response at three days post-vaccination, evident from a small proportion of  
231 DEGs, followed by the highest change in gene expression at day seven before going back to  
232 pre-vaccination gene expression levels. However, NRs did not show significant DEGs at any  
233 time point post-vaccination compared to pre-vaccination (Figure 2B and Supplementary  
234 Figure 3C). Interestingly, ~18% of genes significantly upregulated at day three in TRs were  
235 also significantly upregulated in NRs at all time points (Figure 1C and 2C). Functionally, the  
236 day three transcriptomic profile was enriched in innate immune modules related to antiviral,  
237 interferon and complement activation (Supplementary Figure 3D, Supplementary Data 3).  
238 Consequently, the upregulated inflammatory genes in NRs were categorised in two clusters  
239 depending on their expression patterns: "Transiently up day 3 TRs" or "Consistently up NRs"

240 (Figure 1C and 2C). While “Transiently up day 3 TRs” genes were involved in antiviral  
241 response, the “Consistently up NRs” genes were enriched for modules related to AP-1  
242 transcriptional network, neutrophils and other inflammatory signalling modules, which may  
243 suggest a chronic inflammatory status in NRs (Figure 1C, 2D). These results highlight that  
244 TRs mounted an immune response evident from transcriptional changes at different time  
245 points (percentage of DEGs at day three and day seven) post-vaccination. However, NRs  
246 maintained an inflammatory profile at all time points, which in turn may impede mounting the  
247 vaccine response.

248

249

250 ***Elderly non-responders show higher activation of NK cells seven days post***  
251 ***vaccination.***

252

253 We next examined day seven transcriptional changes in TRs and NRs separately in greater  
254 detail, as day seven showed the highest change in gene expression in TRs compared to pre-  
255 vaccination (Figure 2B). GSEA results in TRs showed strong positive enrichment of multiple  
256 modules particularly related to cell cycle, plasma cells, immunoglobulins and T cell  
257 activation, among others. Even though NRs did not show statistically significant DEGs seven  
258 days post vaccination compared to pre-vaccination, GSEA at this time point showed very  
259 few enrichments related to cell cycle, T cell activation and plasma cells. However, the  
260 inflammatory modules were downregulated in both groups compared to pre-vaccination  
261 (Supplementary Figure 3E, Supplementary Data 3).

262

263 We associated the enriched modules with cell proportions identified through transcriptome  
264 deconvolution. Cell cycle modules were strongly associated with plasma cells in TRs (FDR <  
265 0.05) suggesting clonal expansion of plasma cells, whereas cell cycle modules in NRs did  
266 not show significant associations with any cell subsets (Figure 2E, left). Transcriptional  
267 changes, particularly in plasma cells and B cells seven days post vaccination have also been  
268 shown through single-cell studies<sup>25</sup>. Plasma cell proportions transiently increased at this time  
269 point for TRs, whereas this was not seen in NRs (Figure 1E). This observation is supported  
270 by previous studies which showed that an increase in antibody secreting cells at day seven  
271 correlates positively with high antibody fold change<sup>26</sup>. Instead, activation modules were  
272 strongly positively associated with NK and CD8 T cells in NRs. We also observed similar  
273 associations in TRs, but they were weaker than in NRs (Figure 2E). The deconvolution  
274 results also show higher proportions of activated NK cells in NRs (Figure 1E). Flow  
275 cytometry on donors from the replication cohort also confirmed these findings  
276 (Supplementary Figure 4). A higher proportion of NK cells in NRs compared to TRs has also  
277 been reported in the single-cell dataset<sup>7</sup>. Increased NK cell proportions and activity in the  
278 elderly compared to younger adults has been previously reported<sup>8</sup>. In addition, a significant  
279 negative association of neutrophils with T cell activation BTMs in NRs suggests modulation  
280 of T cell activation by neutrophils. Finally, in NRs, Tregs were negatively associated with  
281 immune activation BTM, which may suggest attempts at suppression of inflammation in  
282 response to vaccination. Altogether, the observed associations link cell subsets to the  
283 functional changes characterised through BTMs and highlight multiple differences in TRs  
284 and NRs post-vaccination. Particularly, we observe higher NK cell proportions and higher  
285 activation of NK cells as a characteristic of the elderly NRs.

286

287



288 ***Post-vaccination plasma proteome and metabolome differences between triple and***  
289 ***non-responders highlight key molecules involved in vaccination response***

290

291 We next evaluated the proteome (Olink-Explore 384 panel) profile between all TRs (n=71)  
292 and NRs (n=10) in our cohort, measuring up to 311 proteins. Differential abundance testing  
293 between TRs and NRs irrespective of time showed higher CLEC7A in TRs in the discovery  
294 cohort (adj. p = 0.03, moderated t-test,), but not in the replication cohort possibly because of  
295 the small effect size (Supplementary Figure 5A, 5B). We next examined protein dynamics  
296 induced by vaccination separately in TRs and NRs by comparing each time point to pre-  
297 vaccination. Unlike the distinct dynamics observed at the transcriptome level in TRs and  
298 NRs, changes in protein abundance in both TRs and NRs seven days post-vaccination were  
299 observed (Figure 3A, Supplementary Data 4). In TRs, 14 proteins were upregulated at seven  
300 days post-vaccination (Figure 3B), among which TNFRSF13B (also known as TAC1) has  
301 been widely described for its role in B cell proliferation and plasma cell differentiation<sup>20,27,28</sup>.  
302 Other proteins upregulated in TRs include IFNLR1<sup>29,30</sup>, a receptor for type three interferons;  
303 CCL3<sup>31</sup> or MIP1a, CD48 and SLAMF7. TNFRSF13B, IFNLR1 and CCL3 also showed a  
304 trend of increased abundance in the replication cohort at day seven post-vaccination  
305 (Supplementary Figure 5B). On the other hand, five distinct proteins were upregulated in  
306 NRs at day seven post-vaccination, including PARP1, EGLN1 and SERPINB8. PARP1 plays  
307 a role in oxidative stress-induced inflammation<sup>32</sup> and also in recruiting NK cells in a viral  
308 response<sup>33</sup>. EGLN1/PHD2 and SERPINB8 are involved in anti-inflammatory roles<sup>34,35</sup>. At day  
309 35, we found relatively fewer changes (Supplementary Figure 5C). Altogether, differences in  
310 plasma proteome dynamics in TRs and NRs highlights the differential response to  
311 vaccination induced in the two groups.

312

313 We also assessed untargeted metabolomic data measured by liquid chromatography-gas  
314 spectrometry (LC-MS) and focused specifically on 192 endogenous metabolites (see  
315 Methods). No significant differentially abundant metabolites between TRs and NRs were  
316 found, irrespective of the time points. However, metabolites in TRs showed significant  
317 changes at day seven and 35 compared to pre-vaccination, whereas this was less evident in  
318 NRs (Figure 3C top, Supplementary Data 5). Summarising the metabolites into taxonomic  
319 classes, TRs showed significant increased abundance of organic acids, particularly amino  
320 acids, crucial for adequate immune function both at seven and 35 days post-vaccination<sup>14</sup>.  
321 On the other hand, metabolites with reduced abundance both at seven and 35 days post-  
322 vaccination were lipids and lipid-like molecules, more specifically fatty acyls (Figure 3C  
323 bottom, Supplementary Figure 5D, 5F). These findings were validated in the replication  
324 cohort, suggesting that overlapping metabolic signatures were induced by vaccination in  
325 both seasons (Supplementary Figure 5E). Interestingly, four out of five upregulated lipids  
326 and lipid-like molecules in TRs are bile acids. Bile acid perturbation has been described in  
327 antibiotics-treated donors with low antibody response to vaccination<sup>12</sup>. In contrast, NRs did  
328 not show any significant differences in metabolite abundance seven days post-vaccination,  
329 but instead showed a decrease in lipid abundance 35 days post-vaccination (Figure 3C top  
330 and bottom). Pathway over-representation analysis in TRs at day seven showed significant  
331 upregulation of metabolic pathways involving amino acid, glycine/serine metabolism and  
332 glucose homeostasis (Figure 3E, Supplementary Data 6). On the other hand, downregulated  
333 metabolic pathways were related to fatty acids, linoleic acid metabolism and signal  
334 transduction, among others. In summary, the increased and sustained abundance of amino

335 acids with reduced abundance of fatty acyls over time suggests the importance of these  
336 metabolite classes in vaccine response.

337

338 Furthermore, we integrated plasma molecules upregulated at day seven with transcriptome  
339 BTMs to derive their functional significance. In TRs, protein concentrations of TNFRSF13B  
340 and IFNLR1 were strongly positively associated with B cells and plasma cell immunoglobulin  
341 modules from transcriptome (False Discovery Rate (FDR) <0.05). The CCL3, GZMA and  
342 CD48 protein concentrations were also significantly positively associated with T cell  
343 transcriptional modules, suggesting their role in the activation of T cells. Among metabolites,  
344 uridine and tyrosine also showed positive associations with T cell activation and plasma cell  
345 numbers, which may imply their involvement in mounting the immune response. Uridine has  
346 previously been shown to be important for T cell proliferation<sup>36</sup>. Beta-alanine, lactic acid and  
347 serine all positively correlated with NK cells (Figure 3F). In contrast, no significant  
348 associations between the proteome and transcriptional modules were found in NRs.  
349 However, EGLN/PHD2, SERPINB8 and NBN were negatively associated with inflammatory  
350 pathways (nominal p-value < 0.05, Supplementary Figure 6). Combining these results, we  
351 show distinct changes in the proteome and metabolome following vaccination and describe  
352 their potential significance in shaping the vaccination response in the elderly vaccine  
353 responders.

354

355

### 356 ***Multi-omics integration reveals a common axis of variation across layers separating*** 357 ***high and low responders***

358

359 Next, we integrated the three omics layers of the highest (TRs, n=10) and lowest responders  
360 (NRs, n=10) to examine the interconnected processes underlying the heterogeneous  
361 influenza vaccine response in the elderly. Using multi-omics factor analysis (MOFA)<sup>37</sup>, an  
362 unsupervised method, 15 latent factors were identified which explained different levels of  
363 data variation along with varying contributions of omics layers within each latent factor  
364 (Figure 4A). Among these, factor three showed a common axis of variation among three  
365 omics layers that separated TRs from NRs irrespective of time (Figure 4B). Examining  
366 significance of the other factors showed that factors four and six were consistent with the  
367 time dynamics differences observed in TRs and NRs (Supplementary Figure 7A).

368

369 To examine the significance of this common axis (latent factor three), we examined the top  
370 proteins and metabolites identified through this factor (Figure 4C) and evaluated these in all  
371 TRs (n=71) and NRs (n=10). Among the proteins, CCL25 and CCL3 were consistently more  
372 abundant in TRs than in NRs. Similarly, for metabolites, the amino acids arginine and  
373 methionine were more abundant in TRs (Figure 4D and Supplementary Figure 7B). To  
374 further assess the significance of these amino acids in immune function, we examined the  
375 association of amino acids with cytokine production capacity, particularly induced upon  
376 influenza stimulation in an independent cohort of 500 healthy individuals<sup>38,39</sup>. Arginine and  
377 methionine showed significant positive associations with IL1 $\beta$ , IL6 and TNF $\alpha$  (Figure 4E,  
378 Supplementary Figure 7C). The increased abundance of these amino acids in TRs and their  
379 positive association to pro-inflammatory cytokine production may indicate their involvement  
380 in shaping the adaptive immune response to influenza vaccination via modulation of cytokine  
381 production.

382



383 Finally, we then created a network of significant intra- and inter-omic connections by  
384 associating plasma molecules with transcriptome BTMs (Methods), overlaying the weights  
385 assigned for TRs (red) and NRs (blue) from MOFA latent factor three (Figure 4E). Across  
386 omic layers, the transcriptome and proteome were highly connected, whereas the  
387 metabolome was less connected to the other two layers. The metabolite arginine was  
388 positively associated with TR-related BTMs involving plasma cells and immunoglobulins.  
389 Similarly, xanthosine was positively associated with immune activation BTMs, which was  
390 estimated as a predictor for NRs. Both xanthosine and orotidine are involved in nucleotide  
391 metabolism which plays an important role in inflammation<sup>40,41</sup>. We also observed strong  
392 positive associations of glyceric acid 1,3-bisphosphate/1,3-BPG with up to seven proteins  
393 that are predictors for NRs. In summary, we describe a common axis of variation in  
394 transcriptome, proteome and metabolome which highlights the interconnected differences in  
395 influenza vaccine response between elderly TRs and NRs.

396  
397

### 398 ***Pre-vaccination high plasma IL-15 concentration negatively correlates with antibody*** 399 ***response***

400

401 One of the prerequisites for complete protection is the ability to produce sufficient antibodies  
402 against all three strains of the influenza vaccine. To prioritise the important pre-vaccination  
403 plasma proteins for antibody response to three strains of influenza vaccine concurrently, we  
404 used partial least square regression (PLSR) in 200 donors (discovery cohort). This allowed  
405 us to perform a systematic investigation of heterogeneity at the pre-vaccination time point.  
406 The resulting proteins from the top three PLSR components explain ~40% variance of the  
407 antibody fold change within the cohort (Figure 5A). We evaluated the top 30 proteins from  
408 each of the three components to examine the directionality of the association with antibody  
409 response per strain (Figure 5B). Overall, the majority of the prioritised proteins showed  
410 contrasting associations with the three strains. Interestingly, TNFSF13/APRIL and IL-15  
411 were negatively associated with antibody fold changes for all three strains (Figure 5B,5C and  
412 Supplementary Figure 8A left). Both these proteins have been described as pro-  
413 inflammatory cytokines and in the pathogenesis of influenza infection<sup>42-44</sup>. In the replication  
414 cohort, we also found IL-15 negatively associated with high antibody changes for two strains,  
415 whereas this was not true for TNFSF13, perhaps due to the small effect size that is hard to  
416 replicate in a smaller cohort (Supplementary Figure 8A right, 8B). Single-cell RNA  
417 sequencing on human PBMCs showed that IL-15 is mainly expressed by monocytes<sup>45</sup>  
418 (Supplementary Figure 8C). Based on these results, the contrasting relationship of the  
419 majority of prioritised proteins against the three strains suggests a complex relationship of  
420 these proteins involved in providing complete protection against influenza infection.  
421 However, the consistent negative association of IL-15 with antibody response in both the  
422 discovery and replication cohort suggests a detrimental role in protection against influenza.

423  
424

### 425 ***High IL-15 concentration leads to reduced antibody titres through NK cells mediated*** 426 ***suppression of germinal centre responses***

427

428 IL-15 is important for NK cell proliferation and maturation<sup>46-48</sup>. From both bulk and previously  
429 reported single-cell transcriptomics<sup>7</sup>, we observed higher frequencies of activated NK cells  
430 and total NK cell numbers in NRs (Figure 1E). NK cells have been described to suppress

431 germinal centre (GC) responses<sup>49,50</sup>. We therefore examined the impact of a perturbation of  
432 the IL-15-NK cell axis on antibody production with *IL15RA*-deficient mice. We immunised  
433 *IL15RA*<sup>+/+</sup> and *IL15RA*<sup>-/-</sup> mice with ovalbumin (OVA-IFA or OVA-Alum) to examine the  
434 resulting humoral response 11 days post-immunization, at the time of maximum GC-  
435 response in this animal model<sup>51</sup> (Figure 5D). *IL15RA*<sup>-/-</sup> mice showed a marked reduction of  
436 NK cells in the spleen (as anticipated, given the importance of IL-15 for NK cell numbers),  
437 without significant differences on B cell populations, but with slight differences on the  
438 frequency of CD4+ and CD8+ T cells (a population that can also be affected by IL-15  
439 reduction) (Figure 5E, Supplementary Figure 9A). In the draining lymph node, we observed a  
440 consistent increase of Tfh cells and a decrease of Treg and Tfr cells in *IL15RA*<sup>-/-</sup> mice,  
441 although without reaching statistical significance (p-values > 0.05) (Supplementary Figure  
442 9B). However, the Tfh/Tfr ratio, critical in the regulation of GC responses<sup>52</sup>, was significantly  
443 higher in *IL15RA*<sup>-/-</sup> mice (p-value = 0.02, Wilcoxon ranked sum-test, Figure 5F). In the same  
444 mice that had an increased Tfh/Tfr ratio, we observed higher production of antibodies,  
445 across two different immunisation protocols (p-values = 0.006 (OVA-Alum) and 0.048 (OVA-  
446 IFA), Wilcoxon ranked-sum test, Figure 5G-H). In conclusion, these results suggest that the  
447 reduction of IL-15 and NK cells led to more effective antibody production, in line with the  
448 data from elderly NRs who displayed higher IL-15 and NK cell activation together with poor  
449 antibody response (Figure 5I).

450

451

#### 452 ***Pre-vaccination plasma malic and citric acid concentrations negatively correlate with*** 453 ***antibody response***

454

455 To evaluate the pre-vaccination metabolite levels with antibody responses against three  
456 strains, PLSR was used in a similar way as described above. Herein, the metabolites in the  
457 top eight PLSR components explain ~40% variation of the antibody fold change among  
458 donors suggesting high inter-individual variation in the donors as a consequence of  
459 metabolic differences (Figure 6A). Metabolites prioritised in the first component showed  
460 malic acid and citric acid as top molecules, with negative associations to antibody response  
461 (Figure 6B, 6C and Supplementary Figure 9A). To derive the role of citric acid and malic acid  
462 in immune function, we associated pre-vaccination abundance of these metabolites with  
463 deeply phenotyped immune cell counts and cytokine production induced upon influenza  
464 stimulation in two independent cohorts of 300 and 500 healthy individuals,  
465 respectively<sup>38,39,53,54</sup>. Citric acid showed significant negative associations with  
466 CD4+CCR6+CCR5+CCR7+ T cells along with three different subsets of immature  
467 neutrophils (FDR<0.05) (Supplementary Figure 9B). Malic acid showed strong negative  
468 associations with TNF $\alpha$ , IL6 and IL1 $\beta$  cytokine levels upon influenza stimulation (Figure 6D).  
469 Furthermore, we found betaine and cysteine as the top predictors from components one and  
470 two, respectively, to be consistently positively associated with antibody response across all  
471 strains (Figure 6B and Supplementary Figure 9C). Betaine has been described for its  
472 inhibition of IL1 $\beta$  production and release<sup>55,56</sup> and for its suppression of pro-inflammatory  
473 signalling during ageing<sup>57</sup>. These results reflect the impact of pre-vaccination metabolite  
474 abundance linked to different physiological immune states across responders culminating in  
475 differential vaccination response in the elderly.

476

477

478 ***Unsaturated long chain fatty acids are negatively associated with pre-vaccination IL-***  
479 ***15 abundance***

480

481 Given the putative role of high IL-15 in suppressing antibody production in the elderly, we  
482 evaluated the relationship of pre-vaccination IL-15 abundance and metabolites. Pre-  
483 vaccination IL-15 showed strong negative associations with odd-chain (pentadecanoic acid)  
484 and certain unsaturated long-chain fatty acids (LCFAs, e.g. palmitoleic acid) (p value < 0.02)  
485 (Figure 6F and Supplementary Figure 9D). These LCFAs were also among the top 30  
486 predictors for PLSR component two, explaining variation in antibody fold change among the  
487 donors (Figure 6E and 6F). LCFAs and especially poly-unsaturated fatty acids have been  
488 described as important immunomodulatory metabolites to protect against infections<sup>58</sup>. To  
489 test the significance particularly of LCFAs in suppressing inflammatory proteins, the  
490 relationship of all pre-vaccination lipid and lipid-like molecules (taxonomy class) with these  
491 proteins was examined. LCFAs were negatively associated with inflammatory proteins,  
492 whereas other lipid molecules showed both positive and negative associations  
493 (Supplementary Figure 9E). We also examined the role of LCFA in a younger cohort  
494 (500FG<sup>38,39</sup>, with 98% donors less than 65 years of age), however, the LCFA-specific  
495 negative associations with inflammatory proteins were absent (Supplementary Figure 9E).  
496 Among the LCFAs, the most significantly negatively associated metabolite was  
497 pentadecanoic acid, an odd-chain fatty acid with anti-inflammatory properties and resistance  
498 to oxidation<sup>59,60</sup>. Taken together, the data suggests an age-dependent role of LCFAs in the  
499 control of inflammation. We described different metabolites associated with IL-15 and other  
500 inflammatory proteins, as well as the antibody fold change, suggesting their role in  
501 modulating the vaccine response in the elderly, particularly LCFAs as potential pre-  
502 vaccination suppressors of high inflammation.

503

504

505

506

507

508

509

510

511

512

513

514

515

516

517

518

519

520

521

522

523

524

525

526  
527  
528  
529  
530  
531  
532  
533  
534  
535  
536  
537  
538  
539  
540  
541  
542  
543  
544  
545  
546  
547  
548  
549  
550  
551  
552  
553  
554  
555  
556  
557  
558  
559  
560  
561  
562  
563  
564  
565  
566  
567  
568  
569  
570  
571  
572  
573

## DISCUSSION

In this work, we evaluated a large cohort of healthy elderly individuals to understand the heterogeneity of influenza vaccination response, specifically to address two main questions: 1) How does the vaccination response differ between responders and non-responders, and 2) Which pre-vaccination biomarkers correlate with the vaccination response. To answer these questions, we examined the transcriptome, proteome and untargeted metabolome of these donors separately, as well as across omics layers.

In the transcriptome, proteome, and metabolome layers, we observed post-vaccination dynamics that were indicative of mounting of an immune response to vaccination in TRs whereas, as expected, these dynamics were absent or altered in NRs. NRs were instead characterised by increased and activated NK cell populations and persistent inflammation. In line with these findings, the NK cell receptor *KLRB1* was shown as a negative predictor for vaccine response in the elderly<sup>21</sup>, whereas *NKG2C* expression was reported as positively correlated with influenza vaccination<sup>61</sup> in healthy individuals. This opposing observation of NK cells may be related to the ageing immune system. Signalling through inflammatory molecules is important for mounting an immune response, while persistent low-grade inflammation, termed ‘inflammaging’, can result in exhaustion and is detrimental to the vaccine response<sup>62,63</sup>. In NRs, evidence from the transcriptome suggests persistent inflammation driven through AP-1 transcriptional networks, among others. On the other hand, the post-vaccination proteins consist of proteins with anti-inflammatory roles. These opposing findings from the different layers may suggest a dysregulation where NRs are attempting to suppress the inflammation resulting from vaccination required for mounting the necessary immune response. A recent study has revealed endotypes predictive of antibody response to vaccination across different vaccines, including influenza<sup>13</sup>. However, this endotype was not identified in elderly (>50 years) individuals. Our study extends these findings in the elderly and defines the pre-vaccination transcriptome profile separating high and low responders, with adaptive immune modules enriched in high responders. This suggests that a high persistent inflammatory status predictive of high responders in the young is increasingly detrimental with age.

Using multi-omics integration for day seven and across time points, we were able to find key molecules that are important in supporting and leading to a productive vaccine response. Interestingly, some of these identified molecules e.g. CCL25, CCL3 and arginine have

574 already been studied as potential immune-adjuvants in vaccination and/or as  
575 supplementation for a better humoral response to vaccination<sup>31,63-65</sup>. CCL25, a chemokine  
576 ligand for CCR9 has been shown to play both pro and anti-inflammatory roles in various  
577 diseases<sup>66</sup>. CCL3 and its receptor CCR5 have been implicated in leukocyte recruitment into  
578 the airway leading to upregulation of antiviral responses in influenza infection<sup>67</sup>. Amino acids  
579 in general are crucial for immune function<sup>14,15</sup>. In fact, we observed consistent upregulation  
580 of amino acids post-vaccination in TRs, but not in NRs. In this study, we showed functional  
581 associations of plasma concentrations of metabolites arginine and methionine to cytokine  
582 production upon influenza stimulation using an independent cohort. The upregulation of  
583 these amino acids in TRs irrespective of vaccination and the role of these molecules in  
584 cytokine production suggests an important role in protective immunity and consequently  
585 markers of protection in elderly TRs. In summary, we indicate biomarkers that support both a  
586 robust immune response to influenza stimulation and the vaccine response.

587  
588 Pre-vaccination plasma IL-15, malic acid, and citric acid concentrations are negatively  
589 associated with antibody response. We propose a model where high abundance of pre-  
590 vaccination IL-15 leads to increased activated NK cells, which in turn inhibit the GCs to  
591 suppress antibody production (Figure 6F). Modulation of adaptive immune responses  
592 through NK cells has been proposed for better vaccine design, where NK cells control the  
593 magnitude and quality of immune response<sup>68-70</sup>. Previous work and our current results have  
594 shown lower levels of T and B cells in NRs compared to TRs<sup>7</sup>. The simultaneous decrease  
595 of T and B cells, with increased NK cell proportions may further cause the suppression of  
596 antibody responses in NRs. Monocytes are the main source of IL-15 in immune cell  
597 populations in human blood and are reported to produce more IL-15 with increasing age<sup>71</sup>.  
598 We did not observe higher monocyte proportions but higher monocyte (inflammatory)  
599 transcriptional activity in NRs. IL-15 has also been described to inhibit apoptosis of  
600 neutrophils<sup>72</sup>, which were more abundant in our NRs.

601  
602 Together, these findings suggest contributions from inflammatory monocytes and neutrophils  
603 in maintaining a persistent inflammatory milieu in NRs. The receptor for IL-15 is also  
604 expressed by dendritic cells and the importance of the cross-talk between NK cells and  
605 dendritic cells in immune cell activation and maturation has been established<sup>73</sup>. We did not  
606 observe differences in deconvoluted dendritic cell proportions between TRs and NRs.  
607 However, cross-talk between these cell subsets within the secondary lymphoid tissues could  
608 play a role during influenza infection and its role in vaccination in the elderly is of interest for  
609 future research. The top predictors from the metabolome PLSR component two consisted of  
610 methionine and fatty acids, particularly unsaturated LCFAs. Methionine was one of the top  
611 predictors for TRs picked by MOFA, as well as one of the top metabolites upregulated at day  
612 seven post vaccination in TRs. Interestingly, unsaturated LCFAs were all negatively  
613 associated with IL-15. Recent work has highlighted the role of fatty acid metabolism in the  
614 IgG1 response to influenza<sup>12</sup>. In line with this, we observed consistent downregulation of  
615 fatty acyls in TRs post-vaccination, whereas this only occurred in NRs at the later time point  
616 (day 35). These findings suggest a multifaceted role of fatty acyls by serving as energy  
617 molecules and/or signalling molecules, thereby modulating the immune response.  
618 Metabolites with known anti-inflammatory properties such as (poly)-unsaturated LCFAs and  
619 odd-chain fatty acids could alleviate the chronic inflammation, leading to a more productive  
620 vaccination response in the elderly.

621



622 We also need to acknowledge the limitations of this study. Larger cohorts are required in  
623 future studies to fully explore the molecular mechanisms leading to a protective or  
624 detrimental vaccine response. This includes examining the role of genetics in interindividual  
625 variation, the host microbiome and its interactions with the metabolome. The role of  
626 comorbidities frequently observed in the elderly (type 2 diabetes, cardiovascular diseases,  
627 etc.) may also affect the response to vaccination. Indeed, we found that a history of diabetes  
628 or herpes zoster (shingles) were independent risk factors for a poor humoral immune  
629 response to the H1N1 vaccine antigen in this study cohort<sup>19</sup>. Furthermore, it was recently  
630 identified in a study of responsiveness to COVID-19 vaccination that comorbidities, such as  
631 diabetes, are associated with a pro-inflammatory response and reduced vaccine  
632 responsiveness<sup>74,75</sup>. Although “inflammaging” associated with pro-inflammatory cytokines is  
633 also emerging as a common feature of poor vaccine responsiveness in people with chronic  
634 diseases and old age, it will be critical to understand the potential universal character of the  
635 identified mechanisms and biomarkers by performing studies using other vaccines and  
636 populations. Therefore, future studies incorporating these factors will provide an improved  
637 understanding of the vaccine response in the elderly. Furthermore, *in vivo* experiments and  
638 clinical trials are required to assess whether modulation of metabolites can improve the  
639 vaccine response in (elderly) non-responders.

640  
641  
642  
643  
644  
645  
646  
647  
648  
649  
650  
651  
652  
653  
654  
655  
656  
657  
658  
659  
660  
661  
662  
663  
664  
665  
666  
667  
668  
669

670  
671  
672  
673  
674  
675  
676  
677  
678  
679  
680  
681  
682  
683  
684  
685  
686  
687  
688  
689  
690  
691  
692  
693  
694  
695  
696  
697  
698  
699  
700  
701  
702  
703  
704  
705  
706  
707  
708  
709  
710  
711  
712  
713  
714  
715  
716

## **ACKNOWLEDGEMENTS & FUNDING**

The authors thank all the participants in this study. We thank the Research Core Unit Metabolomics of the Hannover Medical School for supporting the targeted metabolomics measurements. This work was supported by an ERC starting Grant (948207), a Radboud University Medical Centre Hypatia Grant (2018) and the Deutsche Forschungsgemeinschaft (DFG; German Research Foundation) under Germany's Excellence Strategy - EXC 2155 project number 390874280 to YL and iMed, the Helmholtz Association's Cross Programme Initiative on Personalized Medicine, to CAG and FP. C-JX was supported by a Helmholtz Initiative and Networking Fund (1800167). MGN was supported by an ERC Advanced Grant (833247) and a Spinoza Grant of the Netherlands Organization for Scientific Research. LG research was supported by grants HR22-00741 ("la Caixa" Foundation), and 2022.04903.PTDC (Fundação para a Ciência e Tecnologia Portugal). This project was also partly supported by the European Union's Horizon 2020 research and innovation programme under the Marie Skłodowska-Curie grant agreement No. 955321

## **AUTHOR CONTRIBUTIONS**

Conceptualization and study design: YL  
Sample collection: ST, PR, FP, CAG  
Sample preparation: LZ, AA  
Data analysis and investigation: SK, MZ, NN.  
Murine experiments: RP, LG  
Discussion and interpretation: SK, MZ, ST, PR, JBB, CJX, LABJ, MGN, LG, CAG, FP, YL  
Writing - original manuscript: SK, MZ, JBB, CJX, YL  
Reviewing and editing manuscript: All authors.

## **DECLARATION OF INTERESTS**

The authors declare no competing interests

## **DATA AND CODE AVAILABILITY**

717 Raw data and code will be made available upon publication. Datasets are fully available for  
718 reviewers.

719

720

721

722

723

724

725

726

727

728

729

730

731

732

### 733 **FIGURE LEGENDS**

734

735 **Figure 1.** *Influenza vaccination cohort overview and transcriptome of highest and lowest*  
736 *responders. (A).* Overview of the different omics datasets generated in this study. We  
737 generated multi-modal datasets covering the transcriptome, proteome and metabolome  
738 response to influenza vaccination from up to 234 individuals for different timepoints spanning  
739 both pre and post-vaccination, covering two independent seasons of influenza vaccination.  
740 The serological data is adapted from earlier publications on the same cohort<sup>7,17</sup> **(B).** Circos  
741 plot showing the serological response to trivalent inactivated influenza vaccine (TIV). Each  
742 heatmap depicts pre-vaccination antibody titres against the particular strains included in the  
743 vaccine (H3N2, H1N1, B), whereas the corresponding histograms show the log<sub>2</sub> fold-change  
744 in antibody titres against the strains upon vaccination. Donors were classified as TR, NR or  
745 Other based on their serological response (outer tiles). **(C)** Heatmap showing mean gene  
746 expression levels across 10 TRs and 10 NRs for each time point. Each row is a gene that is  
747 significantly differentially expressed between TRs and NRs, with purple indicating higher  
748 gene expression levels and green indicating lower gene expression levels (adj. p-value <  
749 0.01). **(D)** Top 40 BTMs listed based on gene set enrichment analysis (GSEA) of genes that  
750 are differentially expressed between TRs and NRs. Positive (red) normalised enrichment  
751 scores (NES) correspond to BTMs upregulated in TRs, whereas negative NES corresponds  
752 to BTMs upregulated in NRs. **(E)** Line plots depicting immune cell population proportions for  
753 all timepoints as estimated by CIBERSORT, stratified for TRs and NRs. Each dot is a  
754 sample coloured for TRs (red) or NRs (blue).

755

756 **Figure 2.** *Low inflammatory status at pre-vaccination stage indicator of high responders. (A)*  
757 *BTMs significantly upregulated in TRs at the pre-vaccination timepoint. Boxplots show*  
758 *median with interquartile range and Tukey whiskers. (B)* Line plot summarising changing  
759 gene expression in TRs (red) and NRs (blue) upon vaccination indicated by the percentage  
760 of significantly differentially expressed genes over time compared to pre-vaccination. **(C)**  
761 Line plots for two clusters of genes, where the cluster "Transient day 3 TRs" contains genes  
762 upregulated in TRs at day 3 post-vaccination. Genes in the cluster "consistent up NRs" are  
763 upregulated in NRs at all timepoints. Each dot represents the mean of genes per donor for  
764 each cluster, line plot stratified for TR and NRs. **(D)** Mean expression of genes for significant

765 BTMs and HALLMARK pathways clustered shows split based on transient upregulation in  
766 TRs (top) and downregulation in TRs at all time points (bottom). **(E)** Association of  
767 CIBERSORT cell proportions with cell cycle BTMs (left) and cell type signature BTMs (right)  
768 at seven days post-vaccination. Size of the dots represent adjusted p-values from linear  
769 mixed models, whereas colour represents the estimate from the model. Associations with  
770 adjusted p-values < 0.05 plotted, for TRs, while all associations for NRs with cell cycle BTMs  
771 only irrespective of adjusted p-value threshold (grey). Associations with adj. p-value < 0.05  
772 for cell type signature BTMs for NRs shown.

773

774 **Figure 3** *Plasma proteins and metabolite changes upon vaccination are distinct in TRs and*  
775 *NRs. (A)* Line plot showing significant changes (padj < 0.05) in protein abundance in TRs (N  
776 = 71) and NRs (N=10) post-vaccination. TRs show a higher percentage of significantly  
777 regulated proteins, while NRs show a comparably dampened response. **(B)** Volcano plot of  
778 proteins upregulated in TRs and NRs 7 days post vaccination with significant proteins  
779 coloured in red and labelled; Proteins were considered significant at adj. p-value < 0.05 **(C)**  
780 Line plot showing significant changes in metabolite abundance in TRs (N=71) and NRs  
781 (N=10) post vaccination. **(D)** Significantly differentially regulated metabolites categorised  
782 based on their taxonomic class as annotated by the Human Metabolome Database (HMDB).  
783 The upper and lower parts of the bars represent up- and down regulated metabolites,  
784 respectively. The "Measured" column represents the total universe of metabolites that we  
785 considered (192 endogenous metabolites, see Methods). The TR and NR columns indicate  
786 significantly regulated metabolites at each timepoint compared to day 0. **(E)** Pathways  
787 enriched for metabolites with increased or decreased abundance 7 days post vaccination in  
788 TRs. Enrichment of pathways was calculated using IMPALA. Pathways with adj. p-value <  
789 0.05 are shown. **(F)** Integration of proteins and metabolites with increased abundance at 7  
790 days post vaccination with transcriptome pathways in TRs. Linear mixed models were used  
791 to estimate the association between protein / metabolite abundance and mean  
792 transcriptomic pathway activity (Methods). Drawn links are significant with adj. p-value <  
793 0.05. Colour and width for the links are based on p-values, where wide red links indicate  
794 increased significance.

795

796 **Figure 4** *Multiomics integration of high and low responders (A)* Bar plot showing the  
797 proportion of explained variance per factor resulting from unsupervised factor analysis  
798 method MOFA. Colours within each bar indicate the contribution of each modality. **(B)** MOFA  
799 Factor 3 separates TRs from NRs irrespective of time and across modalities. Y-axis  
800 represents the Factor 3 variance value attributed to each donor. P-values are generated  
801 using a Wilcoxon ranked-sum test. **(C)** Top most positive and negative molecules within the  
802 metabolome and proteome modalities as calculated by MOFA. Molecules are ranked on  
803 MOFA scaled weights for factor 3. Positive weights are for TRs, whereas negative weights  
804 correspond to NRs. **(D)** Abundance of CCL25 and L- arginine in all 81 TR and NRs. P-values  
805 are generated using a Wilcoxon ranked-sum test. **(E)** Association of arginine with cytokine  
806 response post influenza stimulation in 500 FG cohorts. P-values are generated using t-test.  
807 Partial correlation estimate was calculated, corrected for age and gender **(F)** Integrative  
808 network of transcriptome, proteome and metabolome data. Nodes in the network correspond  
809 to molecules (proteome, metabolome) or BTMs (transcriptome). Only molecules and  
810 pathways identified by MOFA weights (Supplementary Figure 6F) are plotted. Edges in the  
811 network (all adj. p-value < 0.05) are statistical associations from linear mixed models (see

812 Methods), where red edges represent positive associations and blue edges represent  
813 negative associations.

814

815 **Figure 5** *Pre-vaccination plasma proteome correlates to the antibody response to*  
816 *vaccination (A)* Proportion of co-variation in proteome and antibody fold change explained by  
817 each component for either each strain or the predictors examined through PLSR analysis  
818 with 10-fold cross validations (N = 200). The first three components using the predictors  
819 were able to explain ~ 40% co-variation in the antibody response and pre-vaccination protein  
820 abundance **(B)** Heatmap of t-test statistics for top predictors with antibody fold change for  
821 top three components as calculated using rank product analysis for these components. Most  
822 proteins show heterogenous associations with the antibody fold change against the three  
823 influenza strains, with notable exceptions for IL-15 and TNFSF13 in component 1. **(C)**  
824 Correlation plots of IL-15 against antibody fold change for all 200 donors. **(D)** *IL15RA*<sup>+/+</sup> and  
825 *IL15RA*<sup>-/-</sup> mice were immunised with OVA-Alum or OVA-IFA in the footpad, followed by  
826 analysis of antibody titres, and lymphocyte populations from inguinal lymph nodes 11 days  
827 post-immunization. **(E)** Proportion of B (CD19+), T (CD3+), NK (NK1.1+) cells, as well as  
828 CD4+ and CD8+ T cell subsets, among splenocytes of unimmunized *IL15RA*<sup>+/+</sup> and *IL15RA*<sup>-/-</sup>  
829 mice. **(F)** Ratio of Tfh/Tfr cells, calculated from their frequency among total CD4+ cells,  
830 within LNs of immunized *IL15RA*<sup>+/+</sup> and *IL15RA*<sup>-/-</sup> mice. **(G)** Serum concentration of OVA-  
831 specific IgG1 in mice immunized with OVA-alum, or **(H)** immunized with OVA-IFA. **(I)**  
832 Schematic summarising the mechanism of IL-15-mediated activation of NK cells leading to  
833 suppression of germinal centre responses and low production of antibodies.

834

835 **Figure 6** *Pre-vaccination plasma metabolites as modulators for vaccination response (A)*  
836 Proportion of co-variation in endogenous metabolites and antibody fold change explained by  
837 each component for either each strain or the predictors examined through PLSR analysis  
838 with 10-fold cross validations (N = 200). The first 8 components were able to explain ~ 40%  
839 co-variation in the antibody response and pre-vaccination metabolite abundance **(B)** Plot of  
840 metabolites from component 1 with their ranks and estimated percentage of false predictions  
841 (PFP) (left), Heatmap of t-test statistic for the top predictors with antibody fold change for the  
842 top component as calculated using rank product analysis for these components (right). Most  
843 metabolites show heterogeneous associations to the different influenza strains in the  
844 vaccine, except for malic acid and citric acid showing negative association while betaine  
845 shows positive association. **(C)** Correlation plots of malic acid against antibody fold change  
846 for all three influenza strains for all 200 donors. **(D)** Association of malic acid to cytokine  
847 production upon influenza stimulation in an independent cohort of 500 younger healthy  
848 individuals, showing a negative trend. P-values are generated using t-test. Partial correlation  
849 estimate was calculated, corrected for age and gender **(E)** Top metabolites for component 2  
850 with their ranks and estimated percentage of false predictions shows long chain fatty acids  
851 as top candidates. **(F)** Negative association of these long chain fatty acids identified in PLSR  
852 component 2 with IL-15. P-values are generated using t-test. Partial correlation estimate was  
853 calculated, corrected for age and gender **(G)** Schematic describing the role of IL-15 in  
854 delayed neutrophil apoptosis, maturation and activation of NK cell populations, leading to  
855 suppression of GC responses and reduced antibody production and a chronic inflammatory  
856 status. Evidence for each observation is derived through different omics layers and  
857 experiments. Connections among different observations were also supported by published  
858 findings.

859



860  
861  
862  
863  
864  
865  
866  
867  
868  
869  
870  
871  
872  
873  
874  
875  
876  
877  
878  
879

## 880 **METHODS**

881

### 882 *Study population*

883

884 The study population has been described before in detail by Riese, Akmatov and  
885 colleagues<sup>7,17</sup>. Briefly, a prospective population-based study across two Influenza seasons  
886 (2014/2015 and 2015/2016) was performed among elderly individuals (>65 years of age)  
887 from Hannover, Germany. Donors from both seasons did not overlap. Participants were  
888 recruited from a random sample from the local population registry and represented the  
889 general population as verified by a survey<sup>18</sup>. Intravenous blood samples were drawn before  
890 vaccination (day 0) and on day 1, day 3, day 6/7, day 21 & day 70 post-vaccination.  
891 Hemagglutination inhibition titres and microneutralization titres were measured as described  
892 before<sup>7</sup>. Briefly, we followed the formulation of the Fluad vaccine and used the following  
893 antigens for titre measurements in serum: H1N1 A/California/7/09 NYMC-X181 (both  
894 seasons), H3N2 A/Texas/50/2012 NYMC-223 (season 2014/2015), H3N2  
895 A/Switzerland/9715293/2013 NIB88 (season 2015/2016), B/Massachusetts/02/2012 NYMC  
896 BX-51B (season 2014/2015) and B\Brisbane/9/2014 (season 2015/2016). Sero-conversion  
897 was defined as either a post-vaccination titre of  $\geq 40$  for individuals with pre-vaccination titres  
898  $< 10$ , or a 4-fold increase in titre upon vaccination for individuals with pre-vaccination titre  
899  $\geq 10$ . Individuals were classified as Triple Responders (TR, sero-conversion against all three  
900 strains), Non-Responders (NR, no sero-conversion against any strain), or Other (sero-  
901 conversion against at least one strain but not all three).

901

### 902 *Bulk transcriptome sequencing*

903

904 Bulk transcriptome sequencing has been described before<sup>7</sup>. In short, ten TRs and ten NRs  
905 were selected based on their serological response to vaccination. We included five time  
906 points per individual: baseline, day 1/3, day 6/7, day 21/35 & day 60/70. miRNA and total  
907 RNA were purified from whole blood samples frozen in PAXgene™ tubes (BD) using the  
“PAXgene Blood miRNA Kit” (Qiagen). The detailed procedure was previously described<sup>7</sup>.

908

909 *Untargeted metabolomics*

910 We assessed the metabolic profiles of 702 individuals from two influenza seasons. Plasma  
911 samples were randomised across plates with respect to vaccine response, sampling time  
912 point and sex. Polar metabolites were extracted from each sample with 180  $\mu$ L 80%  
913 methanol in a deep well extraction plate using 20  $\mu$ L plasma by General Metabolics, Boston,  
914 USA. Samples were vortexed for 15 seconds, incubated at 4°C for one hour and centrifuged  
915 at 4°C, 3750 RPM for 30 minutes. Metabolome profiles of the sample extracts were acquired  
916 using flow-injection mass spectrometry. The method described here is adapted from  
917 previously described methods<sup>76</sup>. The instrumentation consisted of an Agilent 6550 iFunnel  
918 LC-MS Q-TOF mass spectrometer in tandem with an MPS3 autosampler (Gerstel) and an  
919 Agilent 1260 Infinity II quaternary pump. The running buffer was 60% isopropanol in water  
920 (v/v) buffered with 1 mM ammonium fluoride. Hexakis (1H, 1H, 3H-tetrafluoropropoxy)-  
921 phosphazene (Agilent) and 3-amino-1-propanesulfonic acid (HOT) (Sigma Aldrich). The  
922 isocratic flow rate was set to 0.150 mL/min. The instrument was run in 4GHz High  
923 Resolution, negative ionization mode. Mass spectra between 50 and 1,000 m/z were  
924 collected in profile mode. 5  $\mu$ L of each sample were injected twice, consecutively, within 0.96  
925 minutes to serve as technical replicates. The pooled study sample was injected periodically  
926 throughout the batch. Samples were acquired randomly within plates.

927

928 *Targeted metabolomics*

929 Serum concentrations of amino acids were determined by mass spectrometry, using an  
930 HPLC-coupled triple quadrupole mass spectrometer (AP4000, Siex) and the AbsoluteIDQ  
931 p180 kit (Biocrates Life Science AG, Innsbruck, Austria) following the manufacturer's  
932 protocols<sup>77</sup>.

933

934 *Targeted proteomics*

935 We measured 384 circulating proteins in plasma using Olink's proximity extension assay  
936 (PEA) Explore Inflammation panel<sup>78</sup> in 702 individuals. In the PEA, oligonucleotide-labelled  
937 antibodies ("probes") bind the protein of interest. Linking of the probes is triggered by close  
938 proximity of two antibodies which limits cross-reactivity. Upon linking, the probe sequence is  
939 hybridised and subject to extension by DNA polymerases. The resulting sequence is  
940 quantified by real-time polymerase chain reaction. Protein values are expressed as  
941 normalised protein expression (NPX) values, a relative value on a log<sub>2</sub> scale. Quality control  
942 of the raw data was performed by Olink (incubation controls, extension controls and  
943 detection controls).

944

945 *Immunisation, cell isolation and blood serum collection of IL15RA<sup>-/-</sup> and IL15RA<sup>+/+</sup> mice*

946 Sex-matched IL15RA<sup>-/-</sup> and IL15RA<sup>+/+</sup> C57BL/6 mice, aged from 10 to 12 weeks, were  
947 immunized in the back paw footpad with Ovalbumin (OVA, Ovalbumin EndoFit, Invivogen,  
948 #vac-pova) emulsified 1:1 (v:v) with either IFA (IFA, Sigma-Aldrich, #F5506) or Alum (Alu-  
949 Gel-S, Serva, #12261-01). Each animal was inoculated with a volume of 50  $\mu$ L per paw  
950 containing 80  $\mu$ g of OVA (OVA-IFA was injected in two paws while OVA-Alum was injected  
951 in one paw per mouse). Mice were sacrificed 11 days after immunisation and the cells from  
952 the spleen and inguinal lymph nodes (LNs) isolated. Blood serum from each mouse was also  
953 collected at the same time point by cardiac puncture. The mice were bred and maintained  
954 under specific pathogen-free conditions at the Instituto de Medicina Molecular (iMM), where  
955 the experiments were performed under an animal experimentation authorization granted by

956 Direção-Geral de Alimentação e Veterinária (DGAV), the Portuguese national authority for  
957 animal health, and iMM-ORBEA, the Ethic Committee for laboratory animal care at the iMM  
958 Rodent Facility in Lisbon.

959 *Flow cytometry of IL15RA<sup>-/-</sup> and IL15RA<sup>+/+</sup> mice*

960 Characterization of the lymphoid cell populations in the spleen of IL15RA<sup>-/-</sup> and IL15RA<sup>+/+</sup>  
961 C57BL/6 strains was done by flow cytometry with the following antibodies: anti-CD19-FITC  
962 (MB19-1, eBioscience; 1:100), anti-CD3-APC (145-2C11, eBioscience; 1:100), anti-CD4-  
963 BV510 (RM4-5, BioLegend; 1:400), anti-CD8-eF780 (53-6.7, eBioscience; 1:200), and anti-  
964 NK1.1-PECy7 (PK136, eBioscience; 1:100). B and T cells subpopulations present in the  
965 inguinal LNs were first pre-incubated with anti-CXCR5-Biotin (2G8, BD Biosciences; 1:50)  
966 and subsequently stained with anti-CD19-FITC (MB19-1, eBioscience; 1:100), anti-CD95-PE  
967 (Jo2, BD Biosciences; 1:100), anti-ICOS-PerCPCy5.5 (7E.17G9, BioLegend; 1:200), anti-  
968 PD-1-PECy7 (J43, eBioscience; 1:100), anti-GL7-eF660 (GL-7, eBioscience; 1:100), anti-  
969 CD25-APCeF780 (PC61.5, eBioscience; 1:200), anti-CD4-BV510 (RM4-5, BioLegend;  
970 1:400), and anti-CD44-BV605 (IM7, BioLegend; 1:400) together with Streptavidin-BV711  
971 (BioLegend; 1:100). Intracellular Foxp3 (FJK-16s, eBioscience; 1:100) staining was  
972 performed using the Foxp3 Fix/Perm Kit (eBioscience, #00-5521-00) according to the  
973 manufacturer's instructions. The samples were acquired on a BD LSRFortessa cytometer  
974 from the iMM Flow Cytometry Facility and further analyzed on FlowJo software (TreeStar).

975

976 *Anti-OVA IgG quantification of IL15RA<sup>-/-</sup> and IL15RA<sup>+/+</sup> mice*

977 Serum anti-OVA mouse IgG1 was quantified by ELISA. 96-well plate wells were coated with  
978 50 µl OVA (Ovalbumin EndoFit, Invivogen, #vac-pova) at 20 µg/ml in PBS overnight (4 °C),  
979 washed 3 times with ELISA Buffer (Invitrogen, #88-50620-88) and subsequently blocked  
980 with 200 µl of ELISA Buffer for at least 30 minutes. After washing, standards and different  
981 dilutions of each serum sample were plated in duplicates in the coated wells for at least 90  
982 minutes. The standard curve was obtained with measurements from known concentrations  
983 of Anti-OVA [6C8] IgG1 antibody (AbCam, #ab17293). After washing, 50 µl of anti-mouse-  
984 IgG1-HRP (SouthernBiotech, #1070-05) diluted 1:2000 were added to the wells and  
985 incubated for at least 45 minutes. Wells were washed, and 50 µL of the substrate solution  
986 3,3',5,5'-tetramethylbenzidine (TMB Single Solution, Life Technologies) were added per well.  
987 The reaction was stopped with 25 µL of sulfuric acid (H<sub>2</sub>SO<sub>4</sub>) according to the colour  
988 development of the standards. Lastly, optical density (OD) was read at 450 nm within 30  
989 seconds after stopping the reaction. Quantification of Anti-OVA mouse IgG1 in each sample  
990 of blood serum was attained by calculating the concentration of antibody considering the OD  
991 values obtained for a dilution that fitted within the OD values of the standard curve (0.2 > OD  
992 < 1).

993

994 *Flow cytometry of human PBMCs*

995 Cryopreserved PBMCs were thawed, rested for 2 h and incubated overnight with purified  
996 anti-human CD28 and CD49d at a concentration of 10 µg/ml. For surface staining, cells were  
997 incubated with the antibody mixture prepared in PBS for 30 min at 4°C in the dark. Cells  
998 were stained for flow cytometric analysis using the following antibodies: CD3 (BUV395, SK7,  
999 Cat.-No. 564001, dilution 1:200, BD (Franklin Lakes, New Jersey, USA)) and CD56 (BV785,  
1000 5.1H11, Cat.-No. 362550, dilution 1:100, BioLegend (San Diego, USA)). The samples were

1001 acquired at a BD Fortessa flow cytometer using the Diva software and analyzed using  
1002 FlowJo.

1003

#### 1004 *Statistical analyses*

##### 1005 *Bulk transcriptome analysis*

1006 We quantified bulk RNA sequencing data using Salmon<sup>79</sup> using default parameters and the  
1007 human GRCh38 genome. To check for potential outliers, we performed principal component  
1008 analysis (PCA). No samples were removed based on this analysis. We then imported the  
1009 transcript-level quantifications and transcript lengths using tximport<sup>80</sup> and quantified the  
1010 differential expression between responder groups and over time points using a limma-voom  
1011 approach<sup>81,82</sup>:  $gene \sim responder + age + Time + sex + 1|donor$ . For time dynamics, following  
1012 linear model was used:  $gene \sim responderTime + age + sex + 1|donor$ . Functional enrichment  
1013 was performed using gene set enrichment analysis (GSEA) using blood transcription  
1014 modules (BTMs)<sup>23</sup>. Genes were ranked by t-test statistic from this mixed linear model for the  
1015 comparison of interest. P-values were adjusted using Benjamini-Hochberg, where we  
1016 considered adj. p value < 0.01 significant or adj. p value < 0.05.

1017

1018 The relative contribution of individual cell types was estimated using CIBERSORT<sup>24</sup>. using  
1019 the LMM22 background. We defined the pathway activity as the mean expression corrected  
1020 for variance across donors of all genes assigned to a specific BTM per sample. A linear  
1021 model was used to associate the estimated proportions of individual cell types to functional  
1022 pathways:  $cell\ proportion \sim BTM\_score + age + sex + 1|donor$ , done separately for TRs and  
1023 NRs. where *BTM\_score* is the BTM score as described above and *cell proportion* is the  
1024 estimated cellular proportions from CIBERSORT per individual. P-values were adjusted on  
1025 all associations using Benhamini-Hochberg. We considered adj. p-values < 0.05 to be  
1026 significant.

1027

##### 1028 *Targeted proteomics*

1029 We removed measurements that were flagged as unreliable by Olink as well as protein  
1030 assays where the target protein was detected in less than 70% of the samples. Finally, we  
1031 considered 311 high-quality proteome assays for further downstream analyses. We  
1032 performed dimensionality reduction (PCA) to check for potential outliers or batch effects and  
1033 did not identify either.

1034

1035 To quantify the differences in protein abundances between timepoints within each responder  
1036 group separately, we fit a linear mixed model using limma<sup>81</sup>:  $protein \sim time\_responder + age$   
1037  $+ sex + 1|donor$ , where *time\_responder* indicates the sampling time point and responder  
1038 group, and *donor* is the random effect. Benjamini-Hochberg post-hoc correction was used to  
1039 control the false discovery rate across all proteins. We considered adjusted p-values < 0.05  
1040 significant.

1041

##### 1042 *Untargeted metabolomics*

1043 Raw metabolite profile data were centroided, merged and recalibrated using MATLAB  
1044 software as previously described<sup>76</sup>. Putative annotations were generated based on  
1045 compounds contained in the HMDB<sup>83</sup> database using both accurate mass per charge and  
1046 isotopic correlation patterns. We retained only ions that were confidently annotated, allowing  
1047 0.001 Da tolerance between the ion and its corresponding annotation. Since exogenous

1048 and/or drug-related metabolites do not reflect an individual's current immune status and  
1049 could lead to possibly confounding effects, we aimed to consider a set of endogenous  
1050 metabolites. To do so, considered endogenous metabolites from HMDB and matched this to  
1051 our annotated metabolite data based on the ion's chemical formula. Then, we manually re-  
1052 checked whether metabolites were drug-related using the DrugBank database<sup>84</sup>. Metabolites  
1053 associated with medications or other xenobiotics were removed. Finally, we retained 192  
1054 endogenous metabolites for further analyses.

1055  
1056 We validated the quality of our untargeted metabolome data by using a targeted  
1057 metabolomic approach on a subset of the individuals. We manually correlated 18 primary  
1058 amino acids that were reliably detected and annotated between the two platforms and  
1059 observed good replicability (median Pearson's  $r = 0.77$ ). This indicates good sample quality  
1060 and reliable, consistent measurements (Supplementary Figure 11).

1061  
1062 We fit a linear mixed model in limma<sup>81</sup> to quantify differences in endogenous metabolic  
1063 abundances within responder groups over time:  $metabolite \sim time\_responder + age + sex +$   
1064  $1|donor$ , where  $time\_responder$  indicates the sampling time point and responder group, and  
1065  $donor$  is the random effect. We applied Benjamini-Hochberg post-hoc correction on all  
1066 endogenous metabolites and considered metabolites with adjusted p-values  $< 0.05$   
1067 significant. Metabolite classifications to annotate metabolites were retrieved from HMDB. We  
1068 performed metabolite enrichment by performing over-representation analysis using  
1069 IMPALA<sup>85</sup>. Adjusted p-values (Benjamini-Hochberg)  $< 0.05$  were considered significant.

1070  
1071 *Integration of transcriptome, proteome and metabolome layers*

1072 We aimed to provide a comprehensive integration of the different data layers that were  
1073 generated. To do so, we employed two approaches. First, we associated circulating protein  
1074 and metabolite levels to transcriptome pathway activity. We defined pathway activity as  
1075 described above. Proteins and metabolites were selected when differentially abundant at  
1076 Day 7 compared to Day 0. Associations were estimated using a linear mixed model:  $protein$   
1077  $\sim age + gender + BTM + 1|donor$ . P-values were adjusted using Benhamini-Hochberg over  
1078 all obtained associations, and adjusted p-values  $< 0.05$  were considered significant. We  
1079 performed this analysis for Day 7 as we observe the peak of the adaptive immune response  
1080 to vaccination on this day.

1081  
1082 Next, we used Multi-Omics Factor Analysis (MOFA)<sup>37</sup> to perform unsupervised integration of  
1083 all layers. We chose day 0, day 7 and day 35 as we had datasets for these time points  
1084 across all layers for the highest (N = 10) and lowest (N = 10) responders. For transcriptome,  
1085 the top highly variable genes were selected. For proteome and metabolome, we removed  
1086 molecules that were significantly (nominal p-value  $< 0.05$ ) associated with sex. Finally, we  
1087 considered 1560 genes, 279 proteins and 158 metabolites across three timepoints for further  
1088 analysis using MOFA. We applied MOFA standard practices and trained the model on a  
1089 single group. The default data and training model options were used except for  $scale\_views$   
1090 set to TRUE. Following model training, MOFA reported factor 1 correlated with technical  
1091 variation and we thus did not consider this factor. The rest of the factors were evaluated for  
1092 significance with either Responder Category, Age, Gender and Time by testing the factor  
1093 values using a Wilcoxon ranked-sum test. For the factors that are shown, weights are scaled  
1094 for each layer independently and used to identify the top predictors for proteome and  
1095 metabolome. For network building, we performed GSEA using BTMs on the transcripts



1096 ranked by MOFA's scaled weights, and considered adjusted p-values < 0.05 significant. For  
1097 proteome and metabolome, molecules with absolute scaled weights > 0.25 for factor 3 were  
1098 considered and their associations done, similar to BTMs. Associations across layers of  
1099 protein and metabolite molecules to different BTMs controlling for repeated measurements  
1100 from the same donors were done and associations with adjusted p-values < 0.05 were  
1101 selected. Across-layers associations were also calculated and significant associations were  
1102 kept. Cytoscape<sup>86</sup> was used to build the multi-layer network with colour of the nodes  
1103 representing factor 3 scaled weights for each protein or metabolite, or enrichment score for  
1104 transcriptome BTMs.

1105

#### 1106 *Partial least-squares regression*

1107 We employed partial least-squares regression (PLSR) to identify the pre-vaccination proteins  
1108 and metabolites that are most consistently associated with the serological response against  
1109 the three influenza strains. PLSR was performed using the *pls* library in R for proteome and  
1110 metabolome separately using all 200 donors of the discovery cohort. The model was run for  
1111 100 independent iterations with 10-fold cross-validations (e.g. 90% training, 10% testing)  
1112 and we calculated the proportion of variation explained by each PLSR component. For the  
1113 first 3 components we performed rank-product analysis over the 100 iterations to identify the  
1114 top predictors. The top 30 ranked molecules (either proteins or metabolites) were then  
1115 evaluated for their positive or negative association with antibody fold change.

1116

1117

1118

1119

1120

1121

1122

1123

### 1124 **SUPPLEMENTAL INFORMATION TITLES AND LEGEND**

1125

1126 **Supplementary Figure 1** *General demographic factors associated to the serological*  
1127 *response to trivalent inactivated influenza vaccination. (A)* Correlation among  
1128 hemagglutination (HAI) titers fold-change upon vaccination. In both seasons, HAI titers  
1129 against each of the three strains are moderately positively correlated to each other. **(B)**  
1130 Correlation between MN titers and HAI titers across two influenza seasons. Each dot is a  
1131 sample, colours represent influenza strains. **(C)** Impact of sex on the serological response to  
1132 TIV across two seasons. P-values were generated using the Wilcoxon ranked-sum test. **(D)**  
1133 Influence of age on the HAI and microneutralization (MN) titers. Each dot is an individual,  
1134 colours represent the different influenza strains.

1135

1136 **Supplementary Figure 2** *Differences in cellular populations between responders and non-*  
1137 *responders. (A)* Deconvoluted cellular populations were estimated using CIBERSORT from  
1138 bulk transcriptomics data (n=10 TR, n=10 NR) across five different timepoints. Each point  
1139 indicates a sample (NR=blue, TR=red). The curve is a smooth fitted line with standard error  
1140 of the estimation. **(B)** CBC at T1 (pre-vaccination) for Neutrophils, Leucocytes and  
1141 Monocytes for 200 donors. Samples are stratified by their responder status: TR, Other or  
1142 NR.

1143

1144 **Supplementary Figure 3** *Time dynamics and BTMs in TRs and NRs.* **(A)** Significant BTMs  
1145 upregulated in TRs and NRs at pre-vaccination stage. **(B)** Genes enriched for inflammatory  
1146 BTMs and their expression in TRs and NRs. Only CD83 and IL23A are significantly  
1147 (adjusted p-value < 0.05) upregulated in TRs **(C)** Number of significantly differentially  
1148 expressed genes in TRs and NRs, 3days, 7 days, 35 days and 70 days post vaccination **(D)**  
1149 Top 20 significant BTMs upregulated and downregulated in TRs 3 days post vaccination. **(E)**  
1150 BTMs significantly upregulated in TRs (left), NRs (right) 7 days post vaccination.

1151  
1152 **Supplementary Figure 4** *NK cell flow cytometry results from the replication cohort.* Total NK  
1153 cell proportions (top), CD56dim (middle) and CD56bright (bottom) flow cytometry results  
1154 from NRs (n=2, except day 6/7 where n=1) and TRs (n=5).

1155  
1156 **Supplementary Figure 5** *Proteomic and metabolomic response to TIV.* **(A)** CLECL7A  
1157 proteome abundance in all TRs (red) and NRs (blue) over time in the Discovery cohort (top)  
1158 and the Replication cohort (bottom). **(B)** Proteome differential abundance results in the  
1159 replication cohort. **(C)** Volcano plots showing differential abundance results comparing Day  
1160 35 vs Day 0 for TRs (left) and NRs (right) in discovery cohort. Red dots represent  
1161 significantly different proteins at adjusted p-value < 0.05. **(D)** Annotation of the differentially  
1162 abundant metabolites found in the replication cohort. Baseline represents the universe of all  
1163 metabolites measured, whereas TR and NR show significantly differentially abundant  
1164 metabolites (nominal p < 0.05) at T3 and T4, respectively. **(E)** Subclass annotation of  
1165 upregulated organic acids (top) and lipids and lipid-like molecules (bottom). These  
1166 metabolites were significantly differentially abundant (adjusted p < 0.05) in the discovery  
1167 cohort. Pie charts indicate the distribution of significant metabolites within the fatty acids and  
1168 conjugates classification. **(F)** Alluvial plot showing the differential expression results for TRs  
1169 (left) and NRs (right) at the different timepoints compared to baseline in the discovery cohort  
1170 (n=81). Significant metabolites shown (adjusted p-value < 0.05).

1171  
1172 **Supplementary Figure 6** Proteins upregulated in NRs 7 days post vaccination and their  
1173 correlation with transcriptome chronic inflammatory BTMs. Most proteins show a negative  
1174 correlation with unadjusted p-value < 0.05.

1175  
1176 **Supplementary Figure 7** *Multiomics integration capturing different dynamics in TRs and*  
1177 *NRs.* **(A)** Factor 4 and Factor 6 showing time variation captured in TRs. Factor 4 is  
1178 exclusively explained by transcriptome while factor 6 is explained by both transcriptome and  
1179 proteome. **(B)** Abundance of top factor 3 proteins and metabolites in all 81 TRs and NRs. **(C)**  
1180 Methionine positive correlation with cytokine production post influenza stimulation in 500FG  
1181 cohort. **(D)** Distribution of scaled weights attributed to proteins, metabolites and enrichment  
1182 score for transcripts. Molecules with scaled weights of absolute value  $\geq 0.25$  were  
1183 considered for network generation in Figure 4E.

1184  
1185 **Supplementary Figure 8** *Pre-vaccination correlates* **(A)** Plot of TNFSF13/APRIL against  
1186 log2 antibody fold change of each strain in discovery (left) and replication cohort (right). **(B)**  
1187 Plot of IL15 against antibody fold change of each strain in replication cohort. **(C)** Expression  
1188 of IL-15 in human PBMCs using single-cell RNA sequencing data.

1189  
1190 **Supplementary Figure 9** *IL15RA<sup>-/-</sup> mice experiments* **(A)** Representative flow cytometry  
1191 plots showing the frequency of B cells (CD19<sup>+</sup>) and T cells (CD3<sup>+</sup>) in the spleen of IL15RA<sup>-/-</sup>

1192 mice (left plot), and the NK cell frequency (NK1.1+) among splenocytes from IL15RA<sup>+/+</sup> and  
1193 IL15RA<sup>-/-</sup> mice (two plots on the right). **(B)** The dot plots represent the frequency of total B  
1194 cells, GC B cells, total CD4+T cells, CD4+Foxp3- Tconv cells, CD4+Foxp3+ Treg cells, Tfh,  
1195 and Tfr cells in inguinal lymph nodes from IL15RA<sup>+/+</sup> and IL15RA<sup>-/-</sup> mice. Pooled data from  
1196 two independent experiments; n=8 to 10.

1197

1198 **Supplementary Figure 10** *Pre-vaccination metabolite correlates with antibody fold change.*

1199 **(A)** Plot of citric acid against antibody fold change for each strain. **(B)** Plot of citric acid  
1200 abundance against cell proportions calculated from 300BCG cohort. **(C)** Plot of betaine(top)  
1201 and cysteine(bottom) abundance against antibody fold change for each strain. **(D)** Additional  
1202 unsaturated long chain fatty acids negatively correlated to IL15. **(E)** Estimate of protein (42)  
1203 associations to all fatty acids for ~200 elderly donors (left) and to ~ 500 young donors (right).  
1204 In the elderly, LCFA negatively correlated to most proteins while other fatty acids (FAs) show  
1205 both positive and negative correlation while no such pattern observed in the younger cohort.  
1206 Associations with p-value <0.05 plotted.

1207

1208 **Supplementary Figure 11** *Replicability of untargeted metabolomic profiles.* We manually

1209 correlated 19 primary amino acids that were confidently detected in both the untargeted and  
1210 targeted metabolomics dataset. Each dot indicates a sample, coloured for time (10TRs,  
1211 10NRs across three timepoints). We observe good replicability for the primary amino acids.

1212

1213

1214

1215

1216

1217

1218

1219

## 1220 REFERENCES

1221

1222

1223

1224

1225

1226

1227

1228

1229

1230

1231

1232

1233

1234

1235

1236

1237

1238

1. Iuliano, A.D., Roguski, K.M., Chang, H.H., Muscatello, D.J., Palekar, R., Tempia, S., Cohen, C., Gran, J.M., Schanzer, D., Cowling, B.J., et al. (2018). Estimates of global seasonal influenza-associated respiratory mortality: a modelling study. *The Lancet* 391, 1285–1300. 10.1016/S0140-6736(17)33293-2.
2. Osterholm, M.T., Kelley, N.S., Sommer, A., and Belongia, E.A. (2012). Efficacy and effectiveness of influenza vaccines: a systematic review and meta-analysis. *The Lancet Infectious Diseases* 12, 36–44. 10.1016/S1473-3099(11)70295-X.
3. Ferdinands, J.M., Thompson, M.G., Blanton, L., Spencer, S., Grant, L., and Fry, A.M. (2021). Does influenza vaccination attenuate the severity of breakthrough infections? A narrative review and recommendations for further research. *Vaccine* 39, 3678–3695. 10.1016/j.vaccine.2021.05.011.
4. Lang, P.-O., Mendes, Socquet, Assir, Govind, and Aspinall (2012). Effectiveness of influenza vaccine in aging and older adults: comprehensive analysis of the evidence. *CIA*, 55. 10.2147/CIA.S25215.
5. Jefferson, T., Rivetti, D., Rivetti, A., Rudin, M., Di Pietrantonj, C., and Demicheli, V. (2005). Efficacy and effectiveness of influenza vaccines in elderly people: a systematic review. *The Lancet* 366, 1165–1174. 10.1016/S0140-6736(05)67339-4.
6. Goronzy, J.J., and Weyand, C.M. (2013). Understanding immunosenescence to improve responses to vaccines. *Nat Immunol* 14, 428–436. 10.1038/ni.2588.
7. Riese, P., Trittel, S., Akmatov, M.K., May, M., Prokein, J., Illig, T., Schindler, C., Sawitzki, B., Elfaki, Y., Floess, S., et al. (2022). Distinct immunological and molecular signatures underpinning influenza vaccine responsiveness in the elderly. *Nat Commun* 13, 6894. 10.1038/s41467-022-34487-z.

- 1239 8. Nakaya, H.I., Hagan, T., Duraisingham, S.S., Lee, E.K., Kwissa, M., Roupael, N., Frasca, D., Gersten, M., Mehta, A.K.,  
1240 Gaujoux, R., et al. (2015). Systems Analysis of Immunity to Influenza Vaccination across Multiple Years and in Diverse  
1241 Populations Reveals Shared Molecular Signatures. *Immunity* 43, 1186–1198. 10.1016/j.immuni.2015.11.012.
- 1242 9. Nipper, A.J., Smithey, M.J., Shah, R.C., Canaday, D.H., and Landay, A.L. (2018). Diminished antibody response to  
1243 influenza vaccination is characterized by expansion of an age-associated B-cell population with low PAX5. *Clinical*  
1244 *Immunology* 193, 80–87. 10.1016/j.clim.2018.02.003.
- 1245 10. Frasca, D., Diaz, A., Romero, M., Garcia, D., and Blomberg, B.B. (2020). B Cell Immunosenescence. *Annu. Rev. Cell*  
1246 *Dev. Biol.* 36, 551–574. 10.1146/annurev-cellbio-011620-034148.
- 1247 11. Wimmers, F., Donato, M., Kuo, A., Ashuach, T., Gupta, S., Li, C., Dvorak, M., Foecke, M.H., Chang, S.E., Hagan, T., et al.  
1248 (2021). The single-cell epigenomic and transcriptional landscape of immunity to influenza vaccination. *Cell* 184, 3915-  
1249 3935.e21. 10.1016/j.cell.2021.05.039.
- 1250 12. Hagan, T., Cortese, M., Roupael, N., Boudreau, C., Linde, C., Maddur, M.S., Das, J., Wang, H., Guthmiller, J., Zheng,  
1251 N.-Y., et al. (2019). Antibiotics-Driven Gut Microbiome Perturbation Alters Immunity to Vaccines in Humans. *Cell* 178,  
1252 1313-1328.e13. 10.1016/j.cell.2019.08.010.
- 1253 13. Fourati, S., Tomalin, L.E., Mulè, M.P., Chawla, D.G., Gerritsen, B., Rychkov, D., Henrich, E., Miller, H.E.R., Hagan, T.,  
1254 Diray-Arce, J., et al. (2022). Pan-vaccine analysis reveals innate immune endotypes predictive of antibody responses to  
1255 vaccination. *Nat Immunol* 23, 1777–1787. 10.1038/s41590-022-01329-5.
- 1256 14. Kelly, B., and Pearce, E.L. (2020). Amino Assets: How Amino Acids Support Immunity. *Cell Metabolism* 32, 154–175.  
1257 10.1016/j.cmet.2020.06.010.
- 1258 15. Ganeshan, K., and Chawla, A. (2014). Metabolic Regulation of Immune Responses. *Annu. Rev. Immunol.* 32, 609–634.  
1259 10.1146/annurev-immunol-032713-120236.
- 1260 16. Chou, C., Mohanty, S., Kang, H.A., Kong, L., Avila-Pacheco, J., Joshi, S.R., Ueda, I., Devine, L., Raddassi, K., Pierce, K.,  
1261 et al. (2022). Metabolomic and transcriptomic signatures of influenza vaccine response in healthy young and older adults.  
1262 *Aging Cell* 21. 10.1111/acer.13682.
- 1263 17. Akmatov, M.K., Riese, P., May, M., Jentsch, L., Ahmed, M.W., Werner, D., Rösel, A., Tyler, M., Pessler, K., Prokein, J., et  
1264 al. (2017). Establishment of a cohort for deep phenotyping of the immune response to influenza vaccination among elderly  
1265 individuals recruited from the general population. *Human Vaccines & Immunotherapeutics* 13, 1630–1639.  
1266 10.1080/21645515.2017.1299300.
- 1267 18. Akmatov, M.K., Jentsch, L., Riese, P., May, M., Ahmed, M.W., Werner, D., Rösel, A., Prokein, J., Bernemann, I., Klopp,  
1268 N., et al. (2017). Motivations for (non)participation in population-based health studies among the elderly – comparison  
1269 of participants and nonparticipants of a prospective study on influenza vaccination. *BMC Med Res Methodol* 17, 18.  
1270 10.1186/s12874-017-0302-z.
- 1271 19. Akmatov, M.K., Riese, P., Trittel, S., May, M., Prokein, J., Illig, T., Schindler, C., Guzmán, C.A., and Pessler, F. (2019).  
1272 Self-reported diabetes and herpes zoster are associated with a weak humoral response to the seasonal influenza A H1N1  
1273 vaccine antigen among the elderly. *BMC Infect Dis* 19, 656. 10.1186/s12879-019-4214-x.
- 1274 20. Nakaya, H.I., Wrammert, J., Lee, E.K., Racioppi, L., Marie-Kunze, S., Haining, W.N., Means, A.R., Kasturi, S.P., Khan, N.,  
1275 Li, G.-M., et al. (2011). Systems biology of vaccination for seasonal influenza in humans. *Nat Immunol* 12, 786–795.  
1276 10.1038/ni.2067.
- 1277 21. Avey, S., Mohanty, S., Chawla, D.G., Meng, H., Bandaranayake, T., Ueda, I., Zapata, H.J., Park, K., Blevins, T.P., Tsang,  
1278 S., et al. (2020). Seasonal Variability and Shared Molecular Signatures of Inactivated Influenza Vaccination in Young and  
1279 Older Adults. *The Journal of Immunology* 204, 1661–1673. 10.4049/jimmunol.1900922.
- 1280 22. Olafsdottir, T.A., Alexandersson, K.F., Sveinbjornsson, G., Lapini, G., Palladino, L., Montomoli, E., Del Giudice, G.,  
1281 Gudbjartsson, D.F., and Jonsdottir, I. (2018). Age and Influenza-Specific Pre-Vaccination Antibodies Strongly Affect  
1282 Influenza Vaccine Responses in the Icelandic Population whereas Disease and Medication Have Small Effects. *Front.*  
1283 *Immunol.* 8, 1872. 10.3389/fimmu.2017.01872.
- 1284 23. Li, S., Roupael, N., Duraisingham, S., Romero-Steiner, S., Presnell, S., Davis, C., Schmidt, D.S., Johnson, S.E., Milton,  
1285 A., Rajam, G., et al. (2014). Molecular signatures of antibody responses derived from a systems biology study of five  
1286 human vaccines. *Nat Immunol* 15, 195–204. 10.1038/ni.2789.
- 1287 24. Newman, A.M., Liu, C.L., Green, M.R., Gentles, A.J., Feng, W., Xu, Y., Hoang, C.D., Diehn, M., and Alizadeh, A.A.  
1288 (2015). Robust enumeration of cell subsets from tissue expression profiles. *Nat Methods* 12, 453–457.  
1289 10.1038/nmeth.3337.
- 1290 25. Wang, Y., Wang, X., Jia, X., Li, J., Fu, J., Huang, X., Cui, X., Wang, B., Luo, W., Lin, C., et al. (2023). Influenza  
1291 vaccination features revealed by a single-cell transcriptome atlas. *Journal of Medical Virology* 95. 10.1002/jmv.28174.

- 1292 26. Koutsakos, M., Wheatley, A.K., Loh, L., Clemens, E.B., Sant, S., Nüssing, S., Fox, A., Chung, A.W., Laurie, K.L., Hurt,  
1293 A.C., et al. (2018). Circulating T<sub>FH</sub> cells, serological memory, and tissue compartmentalization shape human influenza-  
1294 specific B cell immunity. *Sci. Transl. Med.* 10, ean8405. [10.1126/scitranslmed.aan8405](https://doi.org/10.1126/scitranslmed.aan8405).
- 1295 27. Castigli, E., Wilson, S.A., Scott, S., Dedeoglu, F., Xu, S., Lam, K.-P., Bram, R.J., Jabara, H., and Geha, R.S. (2005). TAC1  
1296 and BAFF-R mediate isotype switching in B cells. *Journal of Experimental Medicine* 201, 35–39. [10.1084/jem.20032000](https://doi.org/10.1084/jem.20032000).
- 1297 28. Mantchev, G.T., Cortesão, C.S., Rebrovich, M., Cascalho, M., and Bram, R.J. (2007). TAC1 Is Required for Efficient  
1298 Plasma Cell Differentiation in Response to T-Independent Type 2 Antigens. *The Journal of Immunology* 179, 2282–2288.  
1299 [10.4049/jimmunol.179.4.2282](https://doi.org/10.4049/jimmunol.179.4.2282).
- 1300 29. de Groen, R.A., Groothuisink, Z.M.A., Liu, B.-S., and Boonstra, A. (2015). IFN- $\lambda$  is able to augment TLR-mediated  
1301 activation and subsequent function of primary human B cells. *Journal of Leukocyte Biology* 98, 623–630.  
1302 [10.1189/jlb.3A0215-041RR](https://doi.org/10.1189/jlb.3A0215-041RR).
- 1303 30. Hemann, E.A., Green, R., Turnbull, J.B., Langlois, R.A., Savan, R., and Gale, M. (2019). Interferon- $\lambda$  modulates dendritic  
1304 cells to facilitate T cell immunity during infection with influenza A virus. *Nat Immunol* 20, 1035–1045. [10.1038/s41590-019-0408-z](https://doi.org/10.1038/s41590-019-0408-z).
- 1306 31. Schaller, T.H., Batich, K.A., Suryadevara, C.M., Desai, R., and Sampson, J.H. (2017). Chemokines as adjuvants for  
1307 immunotherapy: implications for immune activation with CCL3. *Expert Review of Clinical Immunology* 13, 1049–1060.  
1308 [10.1080/1744666X.2017.1384313](https://doi.org/10.1080/1744666X.2017.1384313).
- 1309 32. Pazzaglia, S., and Pioli, C. (2019). Multifaceted Role of PARP-1 in DNA Repair and Inflammation: Pathological and  
1310 Therapeutic Implications in Cancer and Non-Cancer Diseases. *Cells* 9, 41. [10.3390/cells9010041](https://doi.org/10.3390/cells9010041).
- 1311 33. Shou, Q., Fu, H., Huang, X., and Yang, Y. (2019). PARP-1 controls NK cell recruitment to the site of viral infection. *JCI*  
1312 *Insight* 4, e121291. [10.1172/jci.insight.121291](https://doi.org/10.1172/jci.insight.121291).
- 1313 34. Wang, L., Niu, Z., Wang, X., Li, Z., Liu, Y., Luo, F., and Yan, X. (2020). PHD2 exerts anti-cancer and anti-inflammatory  
1314 effects in colon cancer xenografts mice via attenuating NF- $\kappa$ B activity. *Life Sciences* 242, 117167.  
1315 [10.1016/j.lfs.2019.117167](https://doi.org/10.1016/j.lfs.2019.117167).
- 1316 35. Bao, J., Pan, G., Poncz, M., Wei, J., Ran, M., and Zhou, Z. (2018). Serpin functions in host-pathogen interactions. *PeerJ*  
1317 6, e4557. [10.7717/peerj.4557](https://doi.org/10.7717/peerj.4557).
- 1318 36. Battaglia, S., De Santis, S., Rutigliano, M., Sallustio, F., Picerno, A., Frassanito, M.A., Schaefer, I., Vacca, A., Moschetta,  
1319 A., Seibel, P., et al. (2021). Uridine and pyruvate protect T cells' proliferative capacity from mitochondrial toxic antibiotics:  
1320 a clinical pilot study. *Sci Rep* 11, 12841. [10.1038/s41598-021-91559-8](https://doi.org/10.1038/s41598-021-91559-8).
- 1321 37. Argelaguet, R., Velten, B., Arnl, D., Dietrich, S., Zenz, T., Marioni, J.C., Buettner, F., Huber, W., and Stegle, O. (2018).  
1322 Multi-Omics Factor Analysis—a framework for unsupervised integration of multi-omics data sets. *Mol Syst Biol* 14.  
1323 [10.15252/msb.20178124](https://doi.org/10.15252/msb.20178124).
- 1324 38. Bakker, O.B., Aguirre-Gamboa, R., Sanna, S., Oosting, M., Smeekens, S.P., Jaeger, M., Zorro, M., Vösa, U., Withoff, S.,  
1325 Netea-Maier, R.T., et al. (2018). Integration of multi-omics data and deep phenotyping enables prediction of cytokine  
1326 responses. *Nat Immunol* 19, 776–786. [10.1038/s41590-018-0121-3](https://doi.org/10.1038/s41590-018-0121-3).
- 1327 39. Li, Y., Oosting, M., Smeekens, S.P., Jaeger, M., Aguirre-Gamboa, R., Le, K.T.T., Deelen, P., Ricaño-Ponce, I.,  
1328 Schoffelen, T., Jansen, A.F.M., et al. (2016). A Functional Genomics Approach to Understand Variation in Cytokine  
1329 Production in Humans. *Cell* 167, 1099–1110.e14. [10.1016/j.cell.2016.10.017](https://doi.org/10.1016/j.cell.2016.10.017).
- 1330 40. Linden, J., Koch-Nolte, F., and Dahl, G. (2019). Purine Release, Metabolism, and Signaling in the Inflammatory  
1331 Response. *Annu. Rev. Immunol.* 37, 325–347. [10.1146/annurev-immunol-051116-052406](https://doi.org/10.1146/annurev-immunol-051116-052406).
- 1332 41. Idzko, M., Ferrari, D., and Eltzschig, H.K. (2014). Nucleotide signalling during inflammation. *Nature* 509, 310–317.  
1333 [10.1038/nature13085](https://doi.org/10.1038/nature13085).
- 1334 42. Nakamura, R., Maeda, N., Shibata, K., Yamada, H., Kase, T., and Yoshikai, Y. (2010). Interleukin-15 Is Critical in the  
1335 Pathogenesis of Influenza A Virus-Induced Acute Lung Injury. *J Virol* 84, 5574–5582. [10.1128/JVI.02030-09](https://doi.org/10.1128/JVI.02030-09).
- 1336 43. Verbist, K.C., Rose, D.L., Cole, C.J., Field, M.B., and Klonowski, K.D. (2012). IL-15 Participates in the Respiratory Innate  
1337 Immune Response to Influenza Virus Infection. *PLoS ONE* 7, e37539. [10.1371/journal.pone.0037539](https://doi.org/10.1371/journal.pone.0037539).
- 1338 44. Tran, A.T., Rahim, M.N., Ranadheera, C., Kroeker, A., Cortens, J.P., Opanubi, K.J., Wilkins, J.A., and Coombs, K.M.  
1339 (2013). Knockdown of specific host factors protects against influenza virus-induced cell death. *Cell Death Dis* 4, e769–  
1340 e769. [10.1038/cddis.2013.296](https://doi.org/10.1038/cddis.2013.296).



- 1341 45. Debisarun, P.A., Gössling, K.L., Bulut, O., Kilic, G., Zoodsma, M., Liu, Z., Oldenburg, M., Rüchel, N., Zhang, B., Xu, C.-J.,  
1342 et al. (2021). Induction of trained immunity by influenza vaccination - impact on COVID-19. *PLoS Pathog* *17*, e1009928.  
1343 10.1371/journal.ppat.1009928.
- 1344 46. Carson, W.E., Giri, J.G., Lindemann, M.J., Linett, M.L., Ahdieh, M., Paxton, R., Anderson, D., Eisenmann, J., Grabstein,  
1345 K., and Caligiuri, M.A. (1994). Interleukin (IL) 15 is a novel cytokine that activates human natural killer cells via  
1346 components of the IL-2 receptor. *Journal of Experimental Medicine* *180*, 1395–1403. 10.1084/jem.180.4.1395.
- 1347 47. Ma, S., Caligiuri, M.A., and Yu, J. (2022). Harnessing IL-15 signaling to potentiate NK cell-mediated cancer  
1348 immunotherapy. *Trends in Immunology* *43*, 833–847. 10.1016/j.it.2022.08.004.
- 1349 48. Huntington, N.D., Legrand, N., Alves, N.L., Jaron, B., Weijer, K., Plet, A., Corcuff, E., Mortier, E., Jacques, Y., Spits, H., et  
1350 al. (2009). IL-15 trans-presentation promotes human NK cell development and differentiation in vivo. *Journal of*  
1351 *Experimental Medicine* *206*, 25–34. 10.1084/jem.20082013.
- 1352 49. Rydyznski, C., Daniels, K.A., Karmele, E.P., Brooks, T.R., Mahl, S.E., Moran, M.T., Li, C., Sutiwisesak, R., Welsh, R.M.,  
1353 and Waggoner, S.N. (2015). Generation of cellular immune memory and B-cell immunity is impaired by natural killer cells.  
1354 *Nat Commun* *6*, 6375. 10.1038/ncomms7375.
- 1355 50. Rydyznski, C.E., Cranert, S.A., Zhou, J.Q., Xu, H., Kleinstein, S.H., Singh, H., and Waggoner, S.N. (2018). Affinity  
1356 Maturation Is Impaired by Natural Killer Cell Suppression of Germinal Centers. *Cell Reports* *24*, 3367-3373.e4.  
1357 10.1016/j.celrep.2018.08.075.
- 1358 51. Wollenberg, I., Agua-Doce, A., Hernández, A., Almeida, C., Oliveira, V.G., Faro, J., and Graca, L. (2011). Regulation of  
1359 the Germinal Center Reaction by Foxp3+ Follicular Regulatory T Cells. *The Journal of Immunology* *187*, 4553–4560.  
1360 10.4049/jimmunol.1101328.
- 1361 52. Stebegg, M., Kumar, S.D., Silva-Cayetano, A., Fonseca, V.R., Linterman, M.A., and Graca, L. (2018). Regulation of the  
1362 Germinal Center Response. *Front. Immunol.* *9*, 2469. 10.3389/fimmu.2018.02469.
- 1363 53. Chu, X., Jaeger, M., Beumer, J., Bakker, O.B., Aguirre-Gamboa, R., Oosting, M., Smeekens, S.P., Moorlag, S., Mourits,  
1364 V.P., Koeken, V.A.C.M., et al. (2021). Integration of metabolomics, genomics, and immune phenotypes reveals the causal  
1365 roles of metabolites in disease. *Genome Biol* *22*, 198. 10.1186/s13059-021-02413-z.
- 1366 54. Aguirre-Gamboa, R., Joosten, I., Urbano, P.C.M., van der Molen, R.G., van Rijssen, E., van Cranenbroek, B., Oosting, M.,  
1367 Smeekens, S., Jaeger, M., Zorro, M., et al. (2016). Differential Effects of Environmental and Genetic Factors on T and B  
1368 Cell Immune Traits. *Cell Reports* *17*, 2474–2487. 10.1016/j.celrep.2016.10.053.
- 1369 55. Xia, Y., Chen, S., Zhu, G., Huang, R., Yin, Y., and Ren, W. (2018). Betaine Inhibits Interleukin-1 $\beta$  Production and  
1370 Release: Potential Mechanisms. *Front. Immunol.* *9*, 2670. 10.3389/fimmu.2018.02670.
- 1371 56. Zhao, G., He, F., Wu, C., Li, P., Li, N., Deng, J., Zhu, G., Ren, W., and Peng, Y. (2018). Betaine in Inflammation:  
1372 Mechanistic Aspects and Applications. *Front. Immunol.* *9*, 1070. 10.3389/fimmu.2018.01070.
- 1373 57. Go, E.K., Jung, K.J., Kim, J.Y., Yu, B.P., and Chung, H.Y. (2005). Betaine Suppresses Proinflammatory Signaling During  
1374 Aging: The Involvement of Nuclear Factor- $\kappa$ B via Nuclear Factor-Inducing Kinase/ I $\kappa$ B Kinase and Mitogen-Activated  
1375 Protein Kinases. *The Journals of Gerontology Series A: Biological Sciences and Medical Sciences* *60*, 1252–1264.  
1376 10.1093/gerona/60.10.1252.
- 1377 58. Eggersdorfer, M., Berger, M.M., Calder, P.C., Gombart, A.F., Ho, E., Laviano, A., and Meydani, S.N. (2022). Perspective:  
1378 Role of Micronutrients and Omega-3 Long-Chain Polyunsaturated Fatty Acids for Immune Outcomes of Relevance to  
1379 Infections in Older Adults—A Narrative Review and Call for Action. *Advances in Nutrition* *13*, 1415–1430.  
1380 10.1093/advances/nmac058.
- 1381 59. Venn-Watson, S.K., and Butterworth, C.N. (2022). Broader and safer clinically-relevant activities of pentadecanoic acid  
1382 compared to omega-3: Evaluation of an emerging essential fatty acid across twelve primary human cell-based disease  
1383 systems. *PLoS ONE* *17*, e0268778. 10.1371/journal.pone.0268778.
- 1384 60. Venn-Watson, S., Lumpkin, R., and Dennis, E.A. (2020). Efficacy of dietary odd-chain saturated fatty acid pentadecanoic  
1385 acid parallels broad associated health benefits in humans: could it be essential? *Sci Rep* *10*, 8161. 10.1038/s41598-020-  
1386 64960-y.
- 1387 61. Riese, P., Trittel, S., Pathirana, R.D., Klawonn, F., Cox, R.J., and Guzmán, C.A. (2020). Responsiveness to Influenza  
1388 Vaccination Correlates with NKG2C-Expression on NK Cells. *Vaccines* *8*, 281. 10.3390/vaccines8020281.
- 1389 62. Pereira, B., Xu, X.-N., and Akbar, A.N. (2020). Targeting Inflammation and Immunosenescence to Improve Vaccine  
1390 Responses in the Elderly. *Front. Immunol.* *11*, 583019. 10.3389/fimmu.2020.583019.

- 1391 63. Kathuria, N., Kraynyak, K.A., Carnathan, D., Betts, M., Weiner, D.B., and Kutzler, M.A. (2012). Generation of antigen-specific immunity following systemic immunization with DNA vaccine encoding CCL25 chemokine immunoadjuvant. *Human Vaccines & Immunotherapeutics* 8, 1607–1619. 10.4161/hv.22574.  
1392  
1393
- 1394 64. Barbul, A., Sisto, D., Wasserkrug, L., and Efron, G. (1981). Arginine stimulates lymphocyte immune response in healthy human beings. *Surgery* 90, 244–251.  
1395
- 1396 65. Moriguti, J.C., Ferrioli, E., Donadi, E.A., and Marchini, J.S. (2005). Effects of arginine supplementation on the humoral and innate immune response of older people. *Eur J Clin Nutr* 59, 1362–1366. 10.1038/sj.ejcn.1602247.  
1397
- 1398 66. Wu, X., Sun, M., Yang, Z., Lu, C., Wang, Q., Wang, H., Deng, C., Liu, Y., and Yang, Y. (2021). The Roles of CCR9/CCL25 in Inflammation and Inflammation-Associated Diseases. *Front. Cell Dev. Biol.* 9, 686548.  
1399 10.3389/fcell.2021.686548.  
1400
- 1401 67. Ferrero, M.R., Tavares, L.P., and Garcia, C.C. (2022). The Dual Role of CCR5 in the Course of Influenza Infection: Exploring Treatment Opportunities. *Front. Immunol.* 12, 826621. 10.3389/fimmu.2021.826621.  
1402
- 1403 68. Cox, A., Cevik, H., Feldman, H.A., Canaday, L.M., Lakes, N., and Waggoner, S.N. (2021). Targeting natural killer cells to enhance vaccine responses. *Trends in Pharmacological Sciences* 42, 789–801. 10.1016/j.tips.2021.06.004.  
1404
- 1405 69. Frank, K., and Paust, S. (2020). Dynamic Natural Killer Cell and T Cell Responses to Influenza Infection. *Front. Cell. Infect. Microbiol.* 10, 425. 10.3389/fcimb.2020.00425.  
1406
- 1407 70. Mooney, J.P., Qendro, T., Keith, M., Philbey, A.W., Groves, H.T., Tregoning, J.S., Goodier, M.R., and Riley, E.M. (2020). Natural Killer Cells Dampen the Pathogenic Features of Recall Responses to Influenza Infection. *Front. Immunol.* 11, 135. 10.3389/fimmu.2020.00135.  
1408  
1409
- 1410 71. Lee, N., Shin, M.S., Kang, K.S., Yoo, S.-A., Mohanty, S., Montgomery, R.R., Shaw, A.C., and Kang, I. (2014). Human monocytes have increased IFN- $\gamma$ -mediated IL-15 production with age alongside altered IFN- $\gamma$  receptor signaling. *Clinical Immunology* 152, 101–110. 10.1016/j.clim.2014.03.003.  
1411  
1412
- 1413 72. Bouchard, A., Ratthé, C., and Girard, D. (2004). Interleukin-15 delays human neutrophil apoptosis by intracellular events and not via extracellular factors: role of Mcl-1 and decreased activity of caspase-3 and caspase-8. *Journal of Leukocyte Biology* 75, 893–900. 10.1189/jlb.1103585.  
1414  
1415
- 1416 73. Moretta, A. (2002). Natural killer cells and dendritic cells: rendezvous in abused tissues. *Nat Rev Immunol* 2, 957–965. 10.1038/nri956.  
1417
- 1418 74. Graca, L., Faria, A.C., and Ribeiro, R.M. (2023). Illuminating a blind spot in SARS-CoV-2 immunity. *Nat Immunol* 24, 889–890. 10.1038/s41590-023-01518-w.  
1419
- 1420 75. Zhang, W., Kedzierski, L., Chua, B.Y., Mayo, M., Lonzi, C., Rigas, V., Middleton, B.F., McQuilten, H.A., Rowntree, L.C., Allen, L.F., et al. (2023). Robust and prototypical immune responses toward COVID-19 vaccine in First Nations peoples are impacted by comorbidities. *Nat Immunol* 24, 966–978. 10.1038/s41590-023-01508-y.  
1421  
1422
- 1423 76. Fuhrer, T., Heer, D., Begemann, B., and Zamboni, N. (2011). High-Throughput, Accurate Mass Metabolome Profiling of Cellular Extracts by Flow Injection–Time-of-Flight Mass Spectrometry. *Anal. Chem.* 83, 7074–7080. 10.1021/ac201267k.  
1424
- 1425 77. Arshad, H., Siokis, A., Franke, R., Habib, A., Alfonso, J.C.L., Poliakov, Y., Lücke, E., Michaelis, K., Brönstrup, M., Meyer-Hermann, M., et al. (2022). Reprogramming of Amino Acid Metabolism Differs between Community-Acquired Pneumonia and Infection-Associated Exacerbation of Chronic Obstructive Pulmonary Disease. *Cells* 11, 2283. 10.3390/cells11152283.  
1426  
1427  
1428
- 1429 78. Assarsson, E., Lundberg, M., Holmquist, G., Björkstén, J., Bucht Thorsen, S., Ekman, D., Eriksson, A., Rennel Dickens, E., Ohlsson, S., Edfeldt, G., et al. (2014). Homogenous 96-Plex PEA Immunoassay Exhibiting High Sensitivity, Specificity, and Excellent Scalability. *PLoS ONE* 9, e95192. 10.1371/journal.pone.0095192.  
1430  
1431
- 1432 79. Patro, R., Duggal, G., Love, M.I., Irizarry, R.A., and Kingsford, C. (2017). Salmon provides fast and bias-aware quantification of transcript expression. *Nat Methods* 14, 417–419. 10.1038/nmeth.4197.  
1433
- 1434 80. Sonesson, C., Love, M.I., and Robinson, M.D. (2016). Differential analyses for RNA-seq: transcript-level estimates improve gene-level inferences. *F1000Res* 4, 1521. 10.12688/f1000research.7563.2.  
1435
- 1436 81. Ritchie, M.E., Phipson, B., Wu, D., Hu, Y., Law, C.W., Shi, W., and Smyth, G.K. (2015). limma powers differential expression analyses for RNA-sequencing and microarray studies. *Nucleic Acids Research* 43, e47–e47. 10.1093/nar/gkv007.  
1437  
1438
- 1439 82. Law, C.W., Chen, Y., Shi, W., and Smyth, G.K. (2014). voom: precision weights unlock linear model analysis tools for RNA-seq read counts. *Genome Biol* 15, R29. 10.1186/gb-2014-15-2-r29.  
1440

- 1441  
1442  
1443
83. Wishart, D.S., Feunang, Y.D., Marcu, A., Guo, A.C., Liang, K., Vázquez-Fresno, R., Sajed, T., Johnson, D., Li, C., Karu, N., et al. (2018). HMDB 4.0: the human metabolome database for 2018. *Nucleic Acids Research* *46*, D608–D617. 10.1093/nar/gkx1089.
- 1444  
1445  
1446
84. Wishart, D.S., Feunang, Y.D., Guo, A.C., Lo, E.J., Marcu, A., Grant, J.R., Sajed, T., Johnson, D., Li, C., Sayeeda, Z., et al. (2018). DrugBank 5.0: a major update to the DrugBank database for 2018. *Nucleic Acids Research* *46*, D1074–D1082. 10.1093/nar/gkx1037.
- 1447  
1448
85. Kamburov, A., Cavill, R., Ebbels, T.M.D., Herwig, R., and Keun, H.C. (2011). Integrated pathway-level analysis of transcriptomics and metabolomics data with IMPaLA. *Bioinformatics* *27*, 2917–2918. 10.1093/bioinformatics/btr499.
- 1449  
1450
86. Smoot, M.E., Ono, K., Ruscheinski, J., Wang, P.-L., and Ideker, T. (2011). Cytoscape 2.8: new features for data integration and network visualization. *Bioinformatics* *27*, 431–432. 10.1093/bioinformatics/btq675.
- 1451
- 1452
- 1453

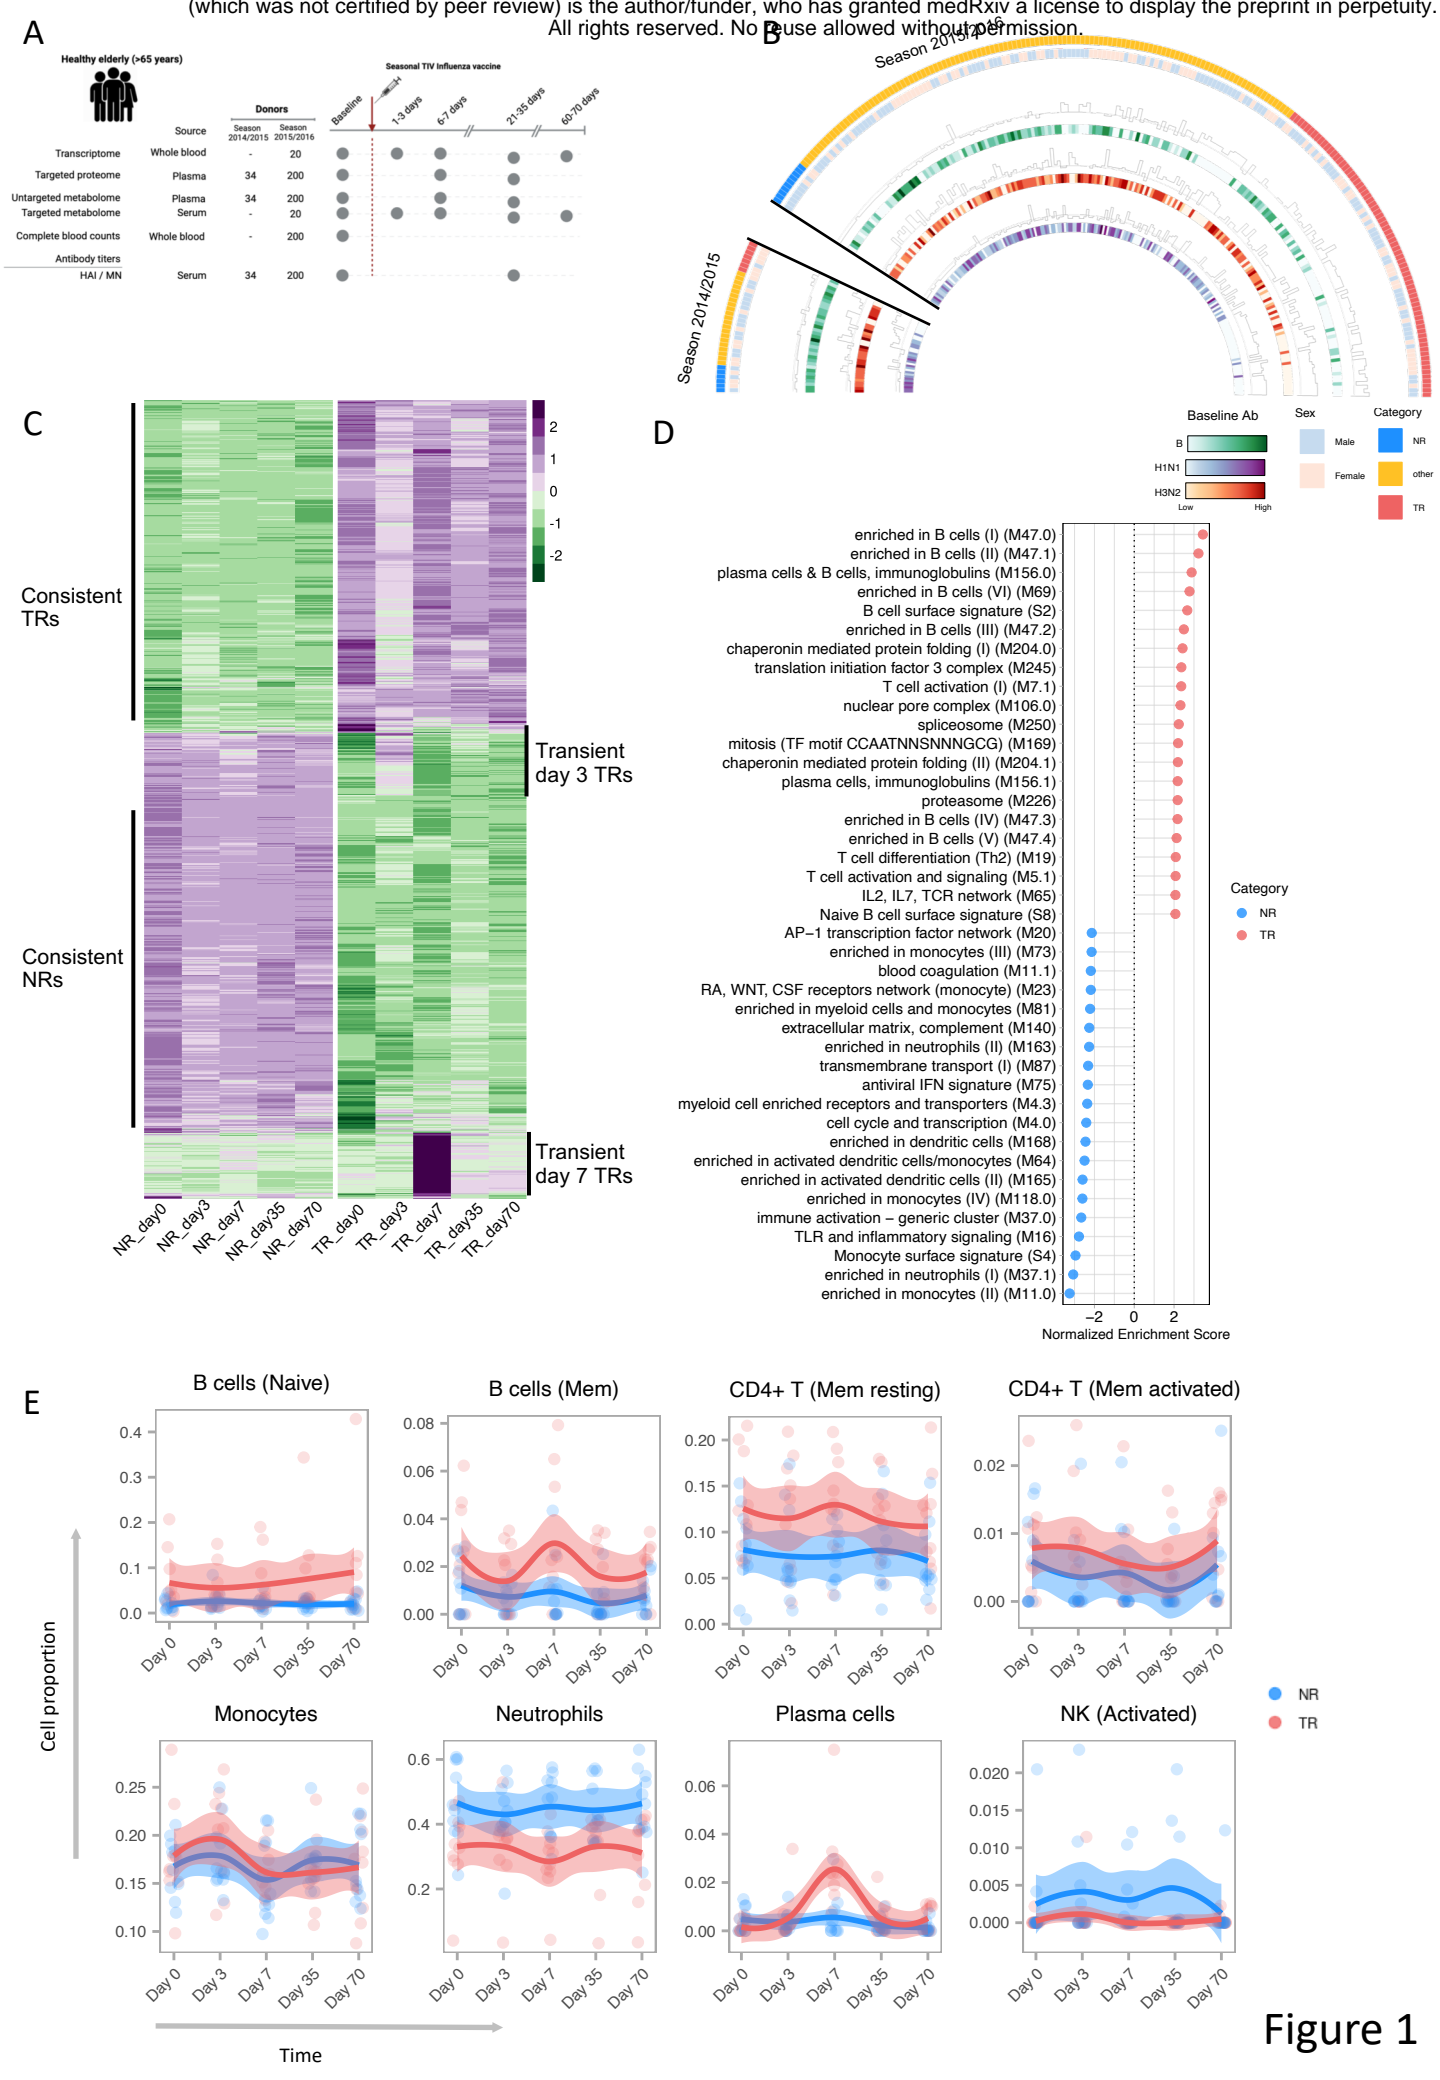

Figure 1

A

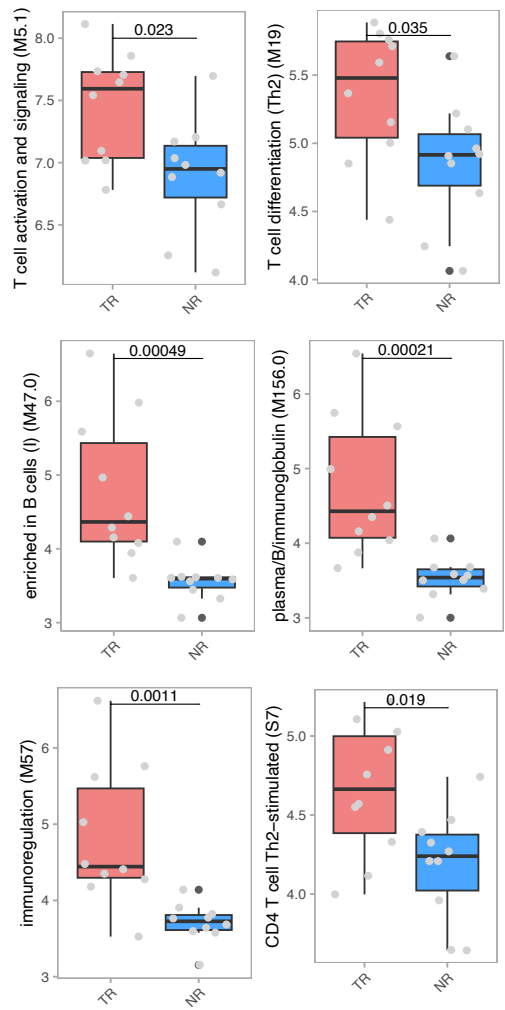

B

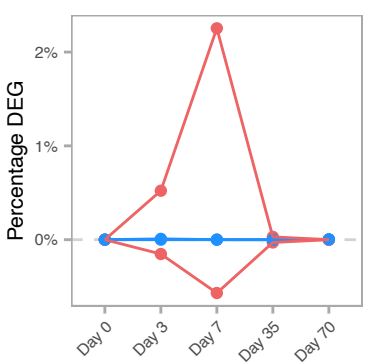

E

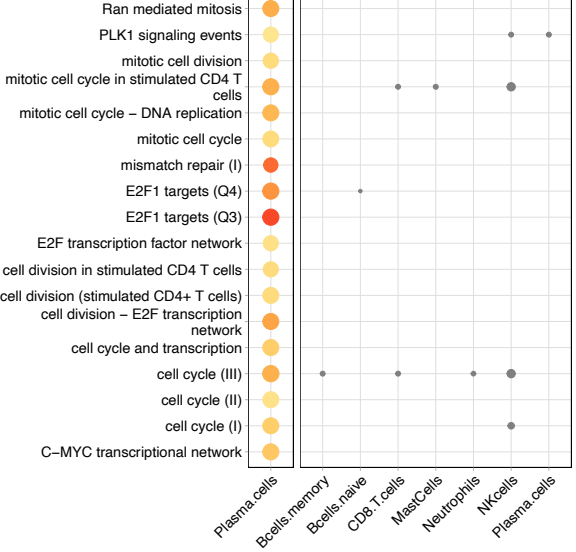

C All transcription upregulated in TR vs NR genes

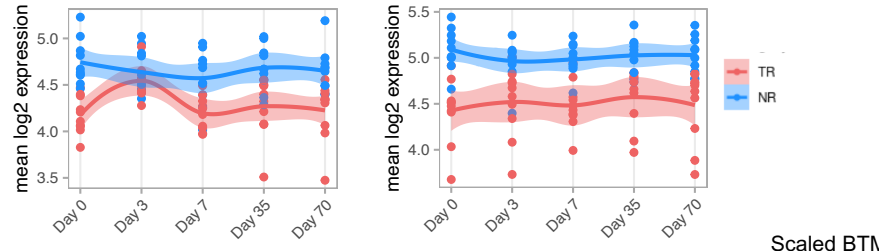

D

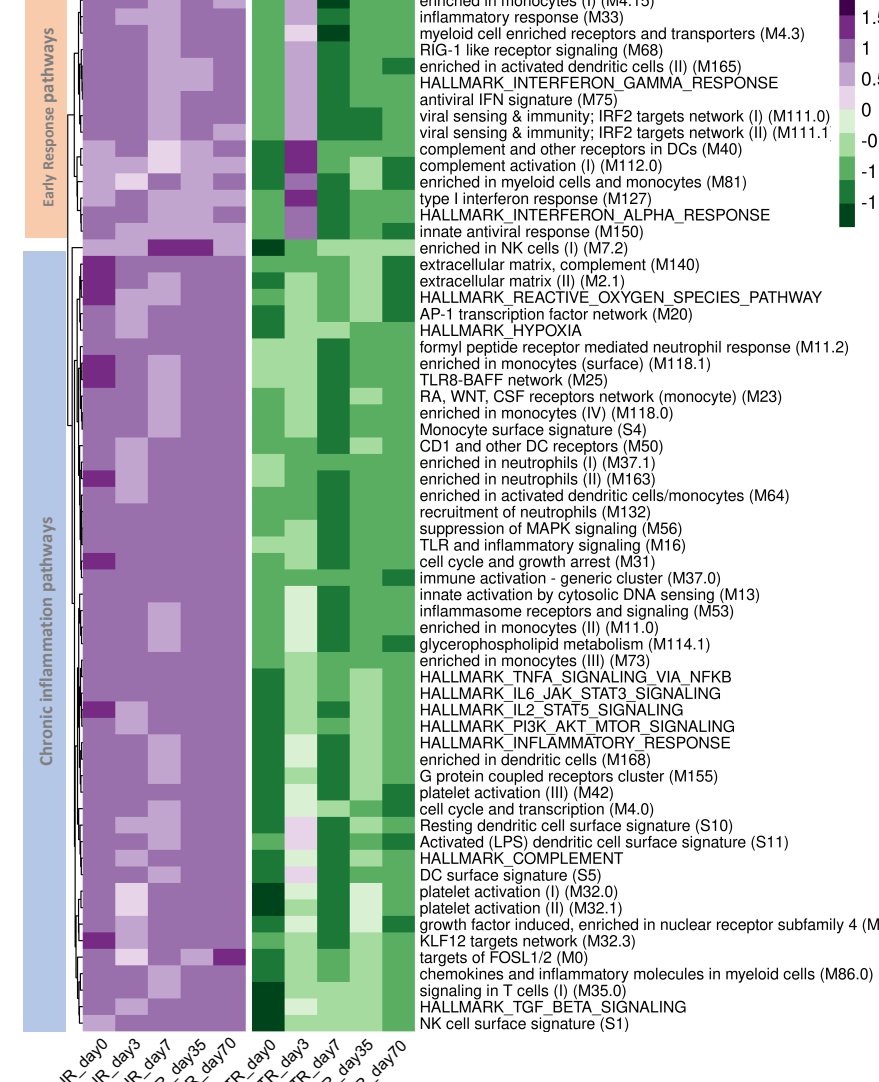

Scaled BTM expression

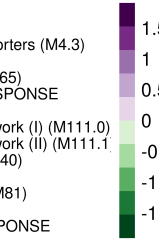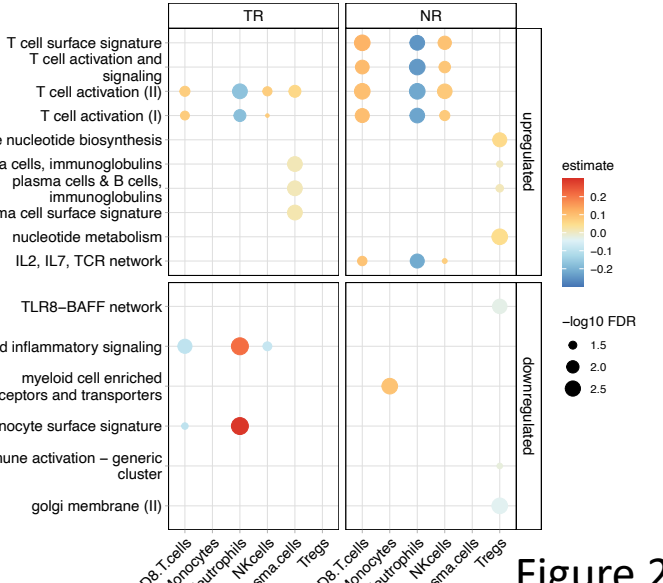

Figure 2



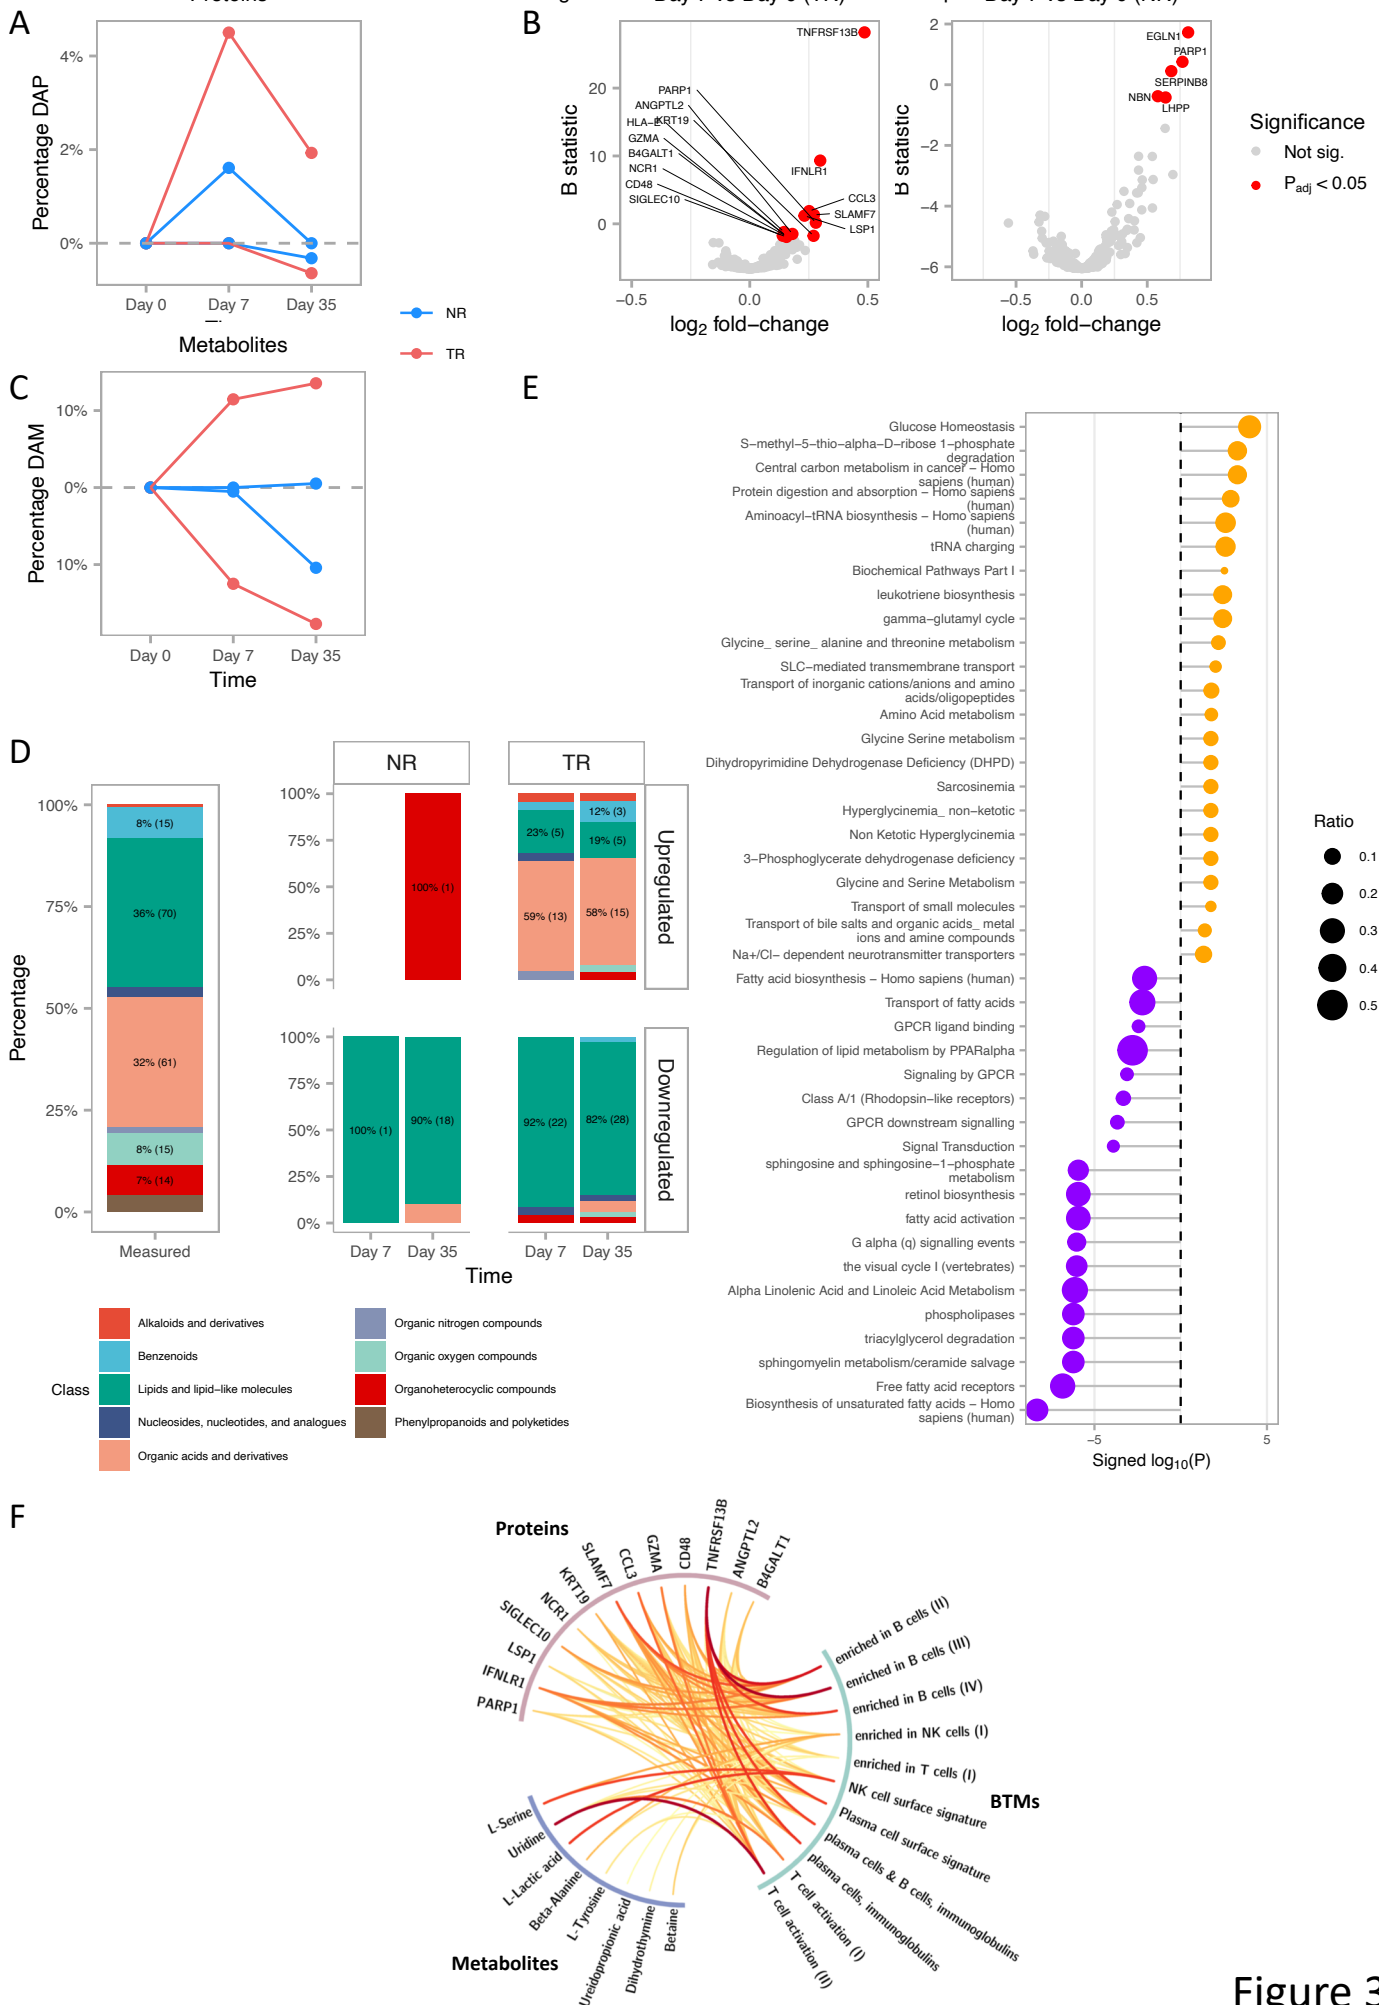

Figure 3

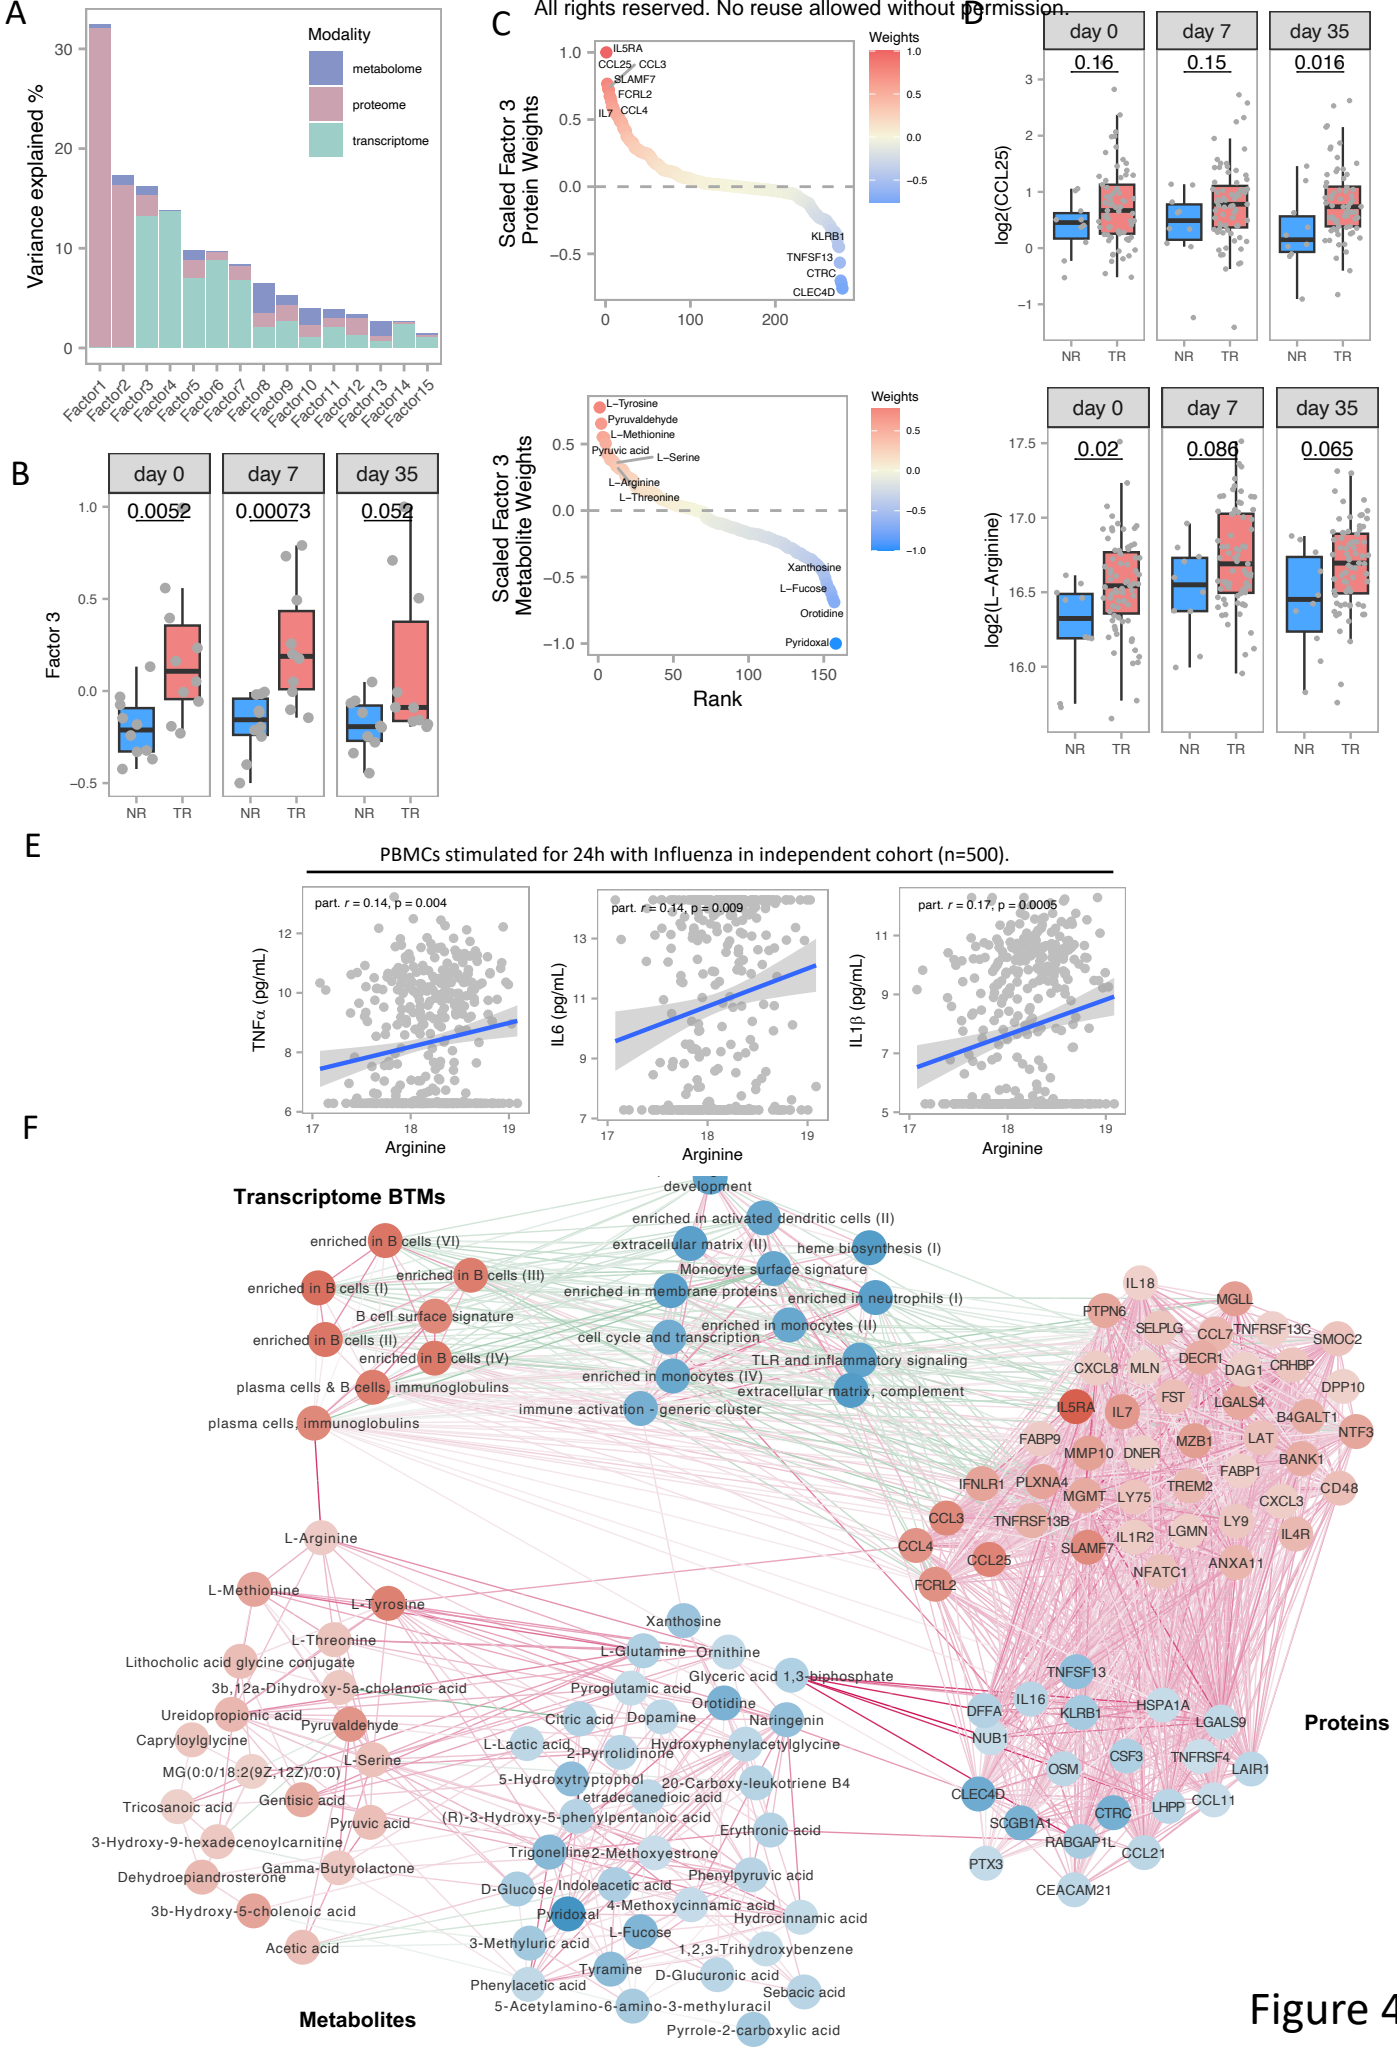

Figure 4

A

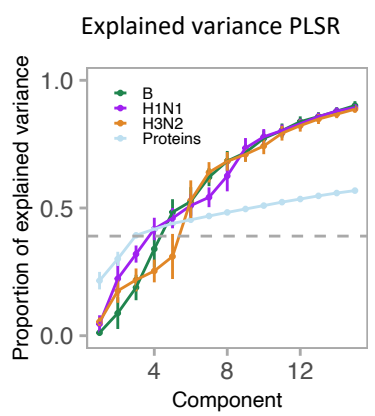

B

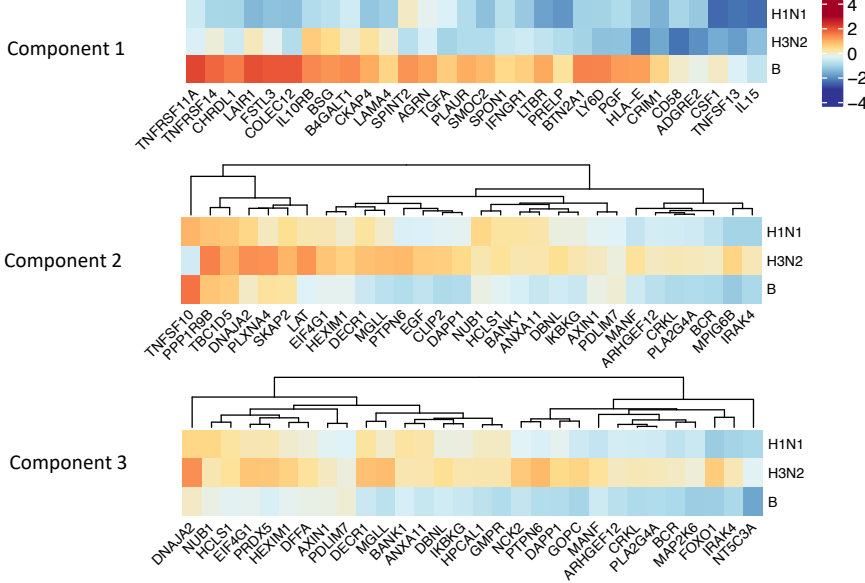

C

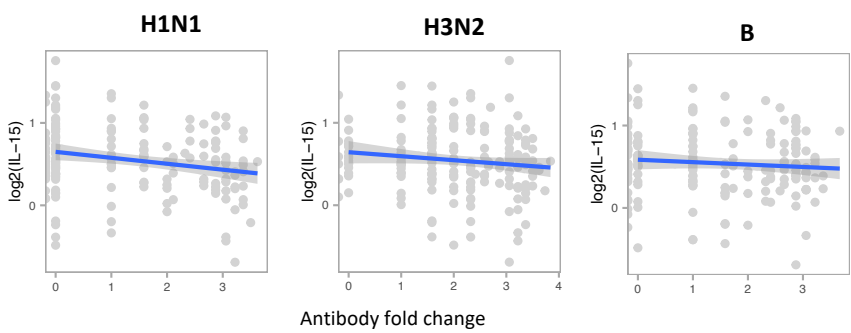

D

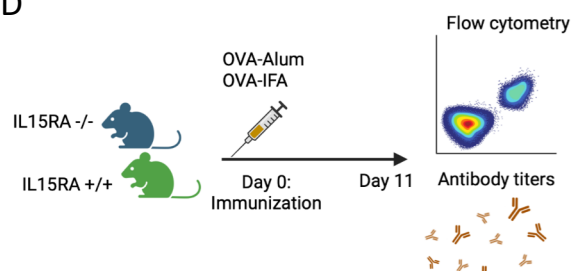

E

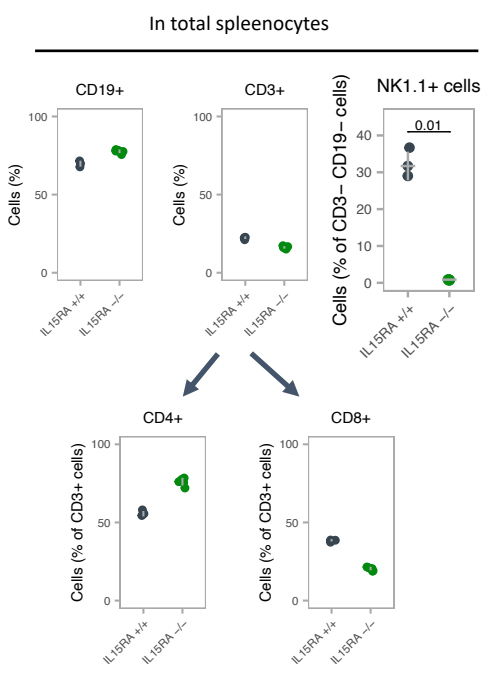

F

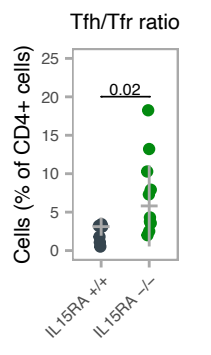

G

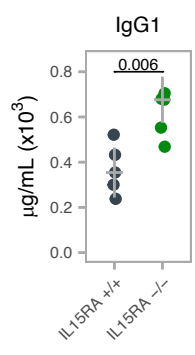

H

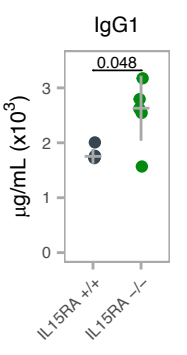

I

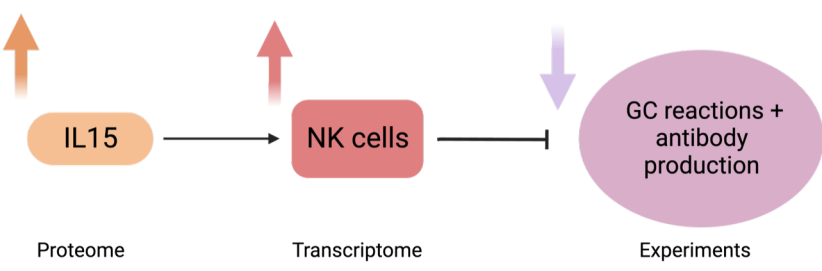

Figure 5

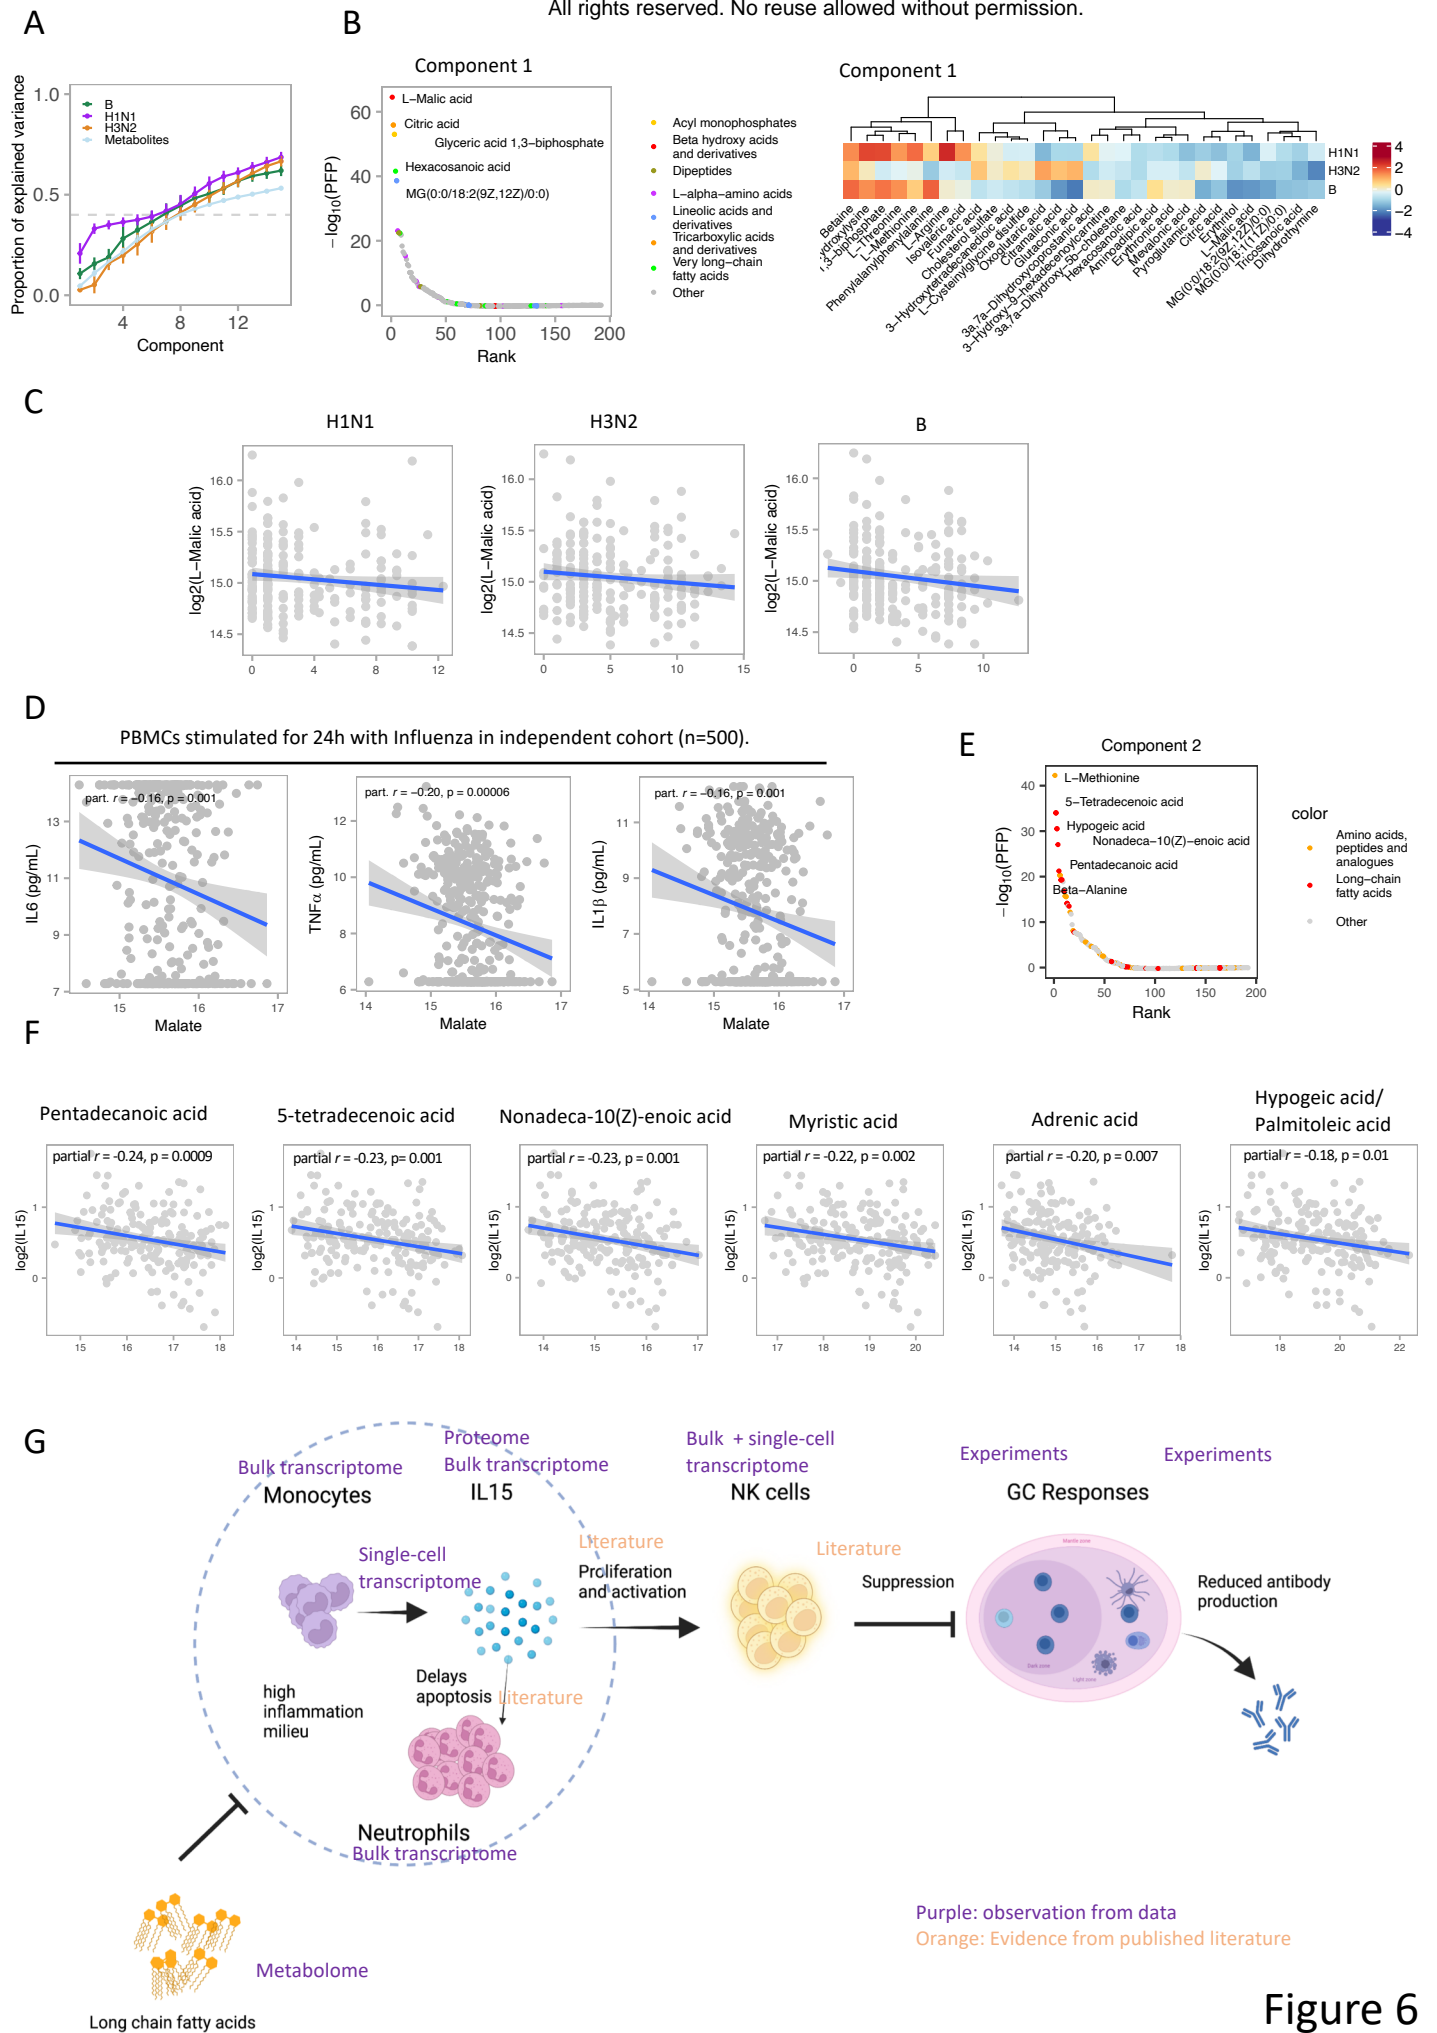

Figure 6
